# Supplementary material
Source: PubMed Central journal article supplement (PMC4838516)
Supplement: NIHMS768967-supplement-Supporting_Information.pdf [file NIHMS768967-supplement-Supporting_Information.pdf]

**SUPPORTING INFORMATION TABLE OF CONTENTS**

|                                                                                                                           |    |
|---------------------------------------------------------------------------------------------------------------------------|----|
| <b>Table S1:</b> Supplemental Parameters for Table 1 (confirmed primary hits against KSHV Pr).....                        | 2  |
| <b>Table S2:</b> Supplemental Parameters for Table 2 (aminothiazoles) .....                                               | 4  |
| <b>Table S3:</b> Indoles .....                                                                                            | 6  |
| <b>Table S4:</b> Trifluoromethylbenzenes .....                                                                            | 8  |
| <b>Table S5:</b> Tetrahydrobenzothienopyrimidines .....                                                                   | 10 |
| <b>Table S6:</b> Tetrahydrodibenzofurans .....                                                                            | 11 |
| <b>Table S7:</b> Tetrahydrocyclopentaindoles .....                                                                        | 11 |
| <b>Table S8:</b> Michaelis-Menten parameters: KSHV Pr, P6R + Fragment 30 .....                                            | 12 |
| <b>Figure S1:</b> <sup>13</sup> C-Met HSQC overlays: KSHV Pr + primary hits .....                                         | 13 |
| <b>Figure S2:</b> <sup>13</sup> C-Ile HSQC overlays: KSHV Pr Δ196 + primary hits .....                                    | 14 |
| <b>Figure S3:</b> <sup>15</sup> N/ <sup>1</sup> H-HSQC overlays: KSHV Pr Δ196 + primary hits .....                        | 15 |
| <b>Figure S4:</b> <sup>15</sup> N/ <sup>1</sup> H CSP Map: KSHV Pr Δ196 + Fragment 6 .....                                | 20 |
| <b>Figure S5:</b> Leu110 amide peak overlay: KSHV Pr Δ196 + primary hits .....                                            | 21 |
| <b>Figure S6:</b> CSPs vs. IC <sub>50</sub> , molecular volume, TPSA: KSHV Pr Δ196 + primary hits ..                      | 22 |
| <b>Figure S7:</b> 1D-STD NMR: HCMV Pr + selected Table 1 fragments .....                                                  | 23 |
| <b>Figure S8:</b> SEC, DLS, HSQC overlays, Michaelis-Menten : KSHV Pr + Frag 30 .....                                     | 24 |
| <b>Figure S9:</b> <sup>13</sup> C-Ile and <sup>15</sup> N/ <sup>1</sup> H HSQC overlays: KSHV Pr Δ196 + Fragment 30 ..... | 25 |
| <b>Figure S10:</b> <sup>15</sup> N/ <sup>1</sup> H CSP Map: KSHV Pr Δ196 + Fragment 30 .....                              | 26 |
| <b>Figure S11:</b> <sup>13</sup> C-Ile HSQC overlays: KSHV Pr Δ196 + aminothiazoles .....                                 | 27 |
| <b>Figure S12:</b> <sup>15</sup> N/ <sup>1</sup> H-HSQC overlays: KSHV Pr Δ196 + aminothiazoles .....                     | 28 |
| <b>Figure S13:</b> <sup>13</sup> C-Ile & <sup>15</sup> N/ <sup>1</sup> H CSPs: KSHV Pr Δ196 + aminothiazoles .....        | 30 |

**Table S1: Supplemental Parameters for Table 1 (Confirmed Primary hits against KSHV Pr)**

| Fragment ID | MW    | LE (KSHV Pr) | LogD | LipE (pIC <sub>50</sub> - LogD) | TPSA (Å <sup>2</sup> ) | Molecular Volume (Å <sup>3</sup> ) | SMILES                                       |
|-------------|-------|--------------|------|---------------------------------|------------------------|------------------------------------|----------------------------------------------|
| 1           | 210.7 | 0.46         | 3.12 | 1.17                            | 33.45                  | 170.55                             | <chem>N=C1NC(=CS1)c2ccc(Cl)cc2</chem>        |
| 2           | 212.2 | 0.34         | 2.81 | 0.58                            | 38.91                  | 163.16                             | <chem>Nc1nc(cs1)c2cc(F)c(F)cc2</chem>        |
| 3           | 218.2 | 0.33         | 2.85 | 0.46                            | 38.91                  | 157.18                             | <chem>FC(F)(F)c1ccc2nc(N)sc2c1</chem>        |
| 4           | 226.7 | 0.37         | 3.87 | -0.14                           | 24.39                  | 190.69                             | <chem>Cc1ccc(cc1Cl)NC2=NCCS2</chem>          |
| 5           | 196.0 | 0.49         | 2.84 | 0.63                            | 15.79                  | 130.91                             | <chem>Brc1ccc2ccnc2c1</chem>                 |
| 6           | 210.1 | 0.43         | 3.35 | 0.02                            | 15.79                  | 147.47                             | <chem>Brc1cc2c(cc1)ncc2C</chem>              |
| 7           | 267.3 | n/a          | 0.96 | 2.29                            | 62.32                  | 237.22                             | <chem>O=C(O)c1cc2cc(ccc2n1)OCc3ccccc3</chem> |
| 8           | 187.2 | 0.41         | 2.52 | 1.57                            | 39.16                  | 177.26                             | <chem>Nc1cc2c(cc1)oc3CCCCc23</chem>          |
| 9           | 233.3 | 0.35         | 3.58 | 0.47                            | 29.02                  | 212.71                             | <chem>CN(C)c2ncnc1sc3CCCCc3c12</chem>        |
| 10          | 254.3 | 0.27         | 3.08 | 0.63                            | 72.19                  | 233.67                             | <chem>O=C(Nc1ccccc1C(N)=O)c2ccc(C)cc2</chem> |
| 11          | 212.2 | n/a          | 3.56 | -0.56                           | 55.12                  | 198.13                             | <chem>NC(=O)c2ccccc2Nc1ccccc1</chem>         |

| Fragment ID        | MW    | LE (KSHV Pr) | LogD  | LipE (pIC <sub>50</sub> - LogD) | TPSA (Å <sup>2</sup> ) | Molecular Volume (Å <sup>3</sup> ) | SMILES                                           |
|--------------------|-------|--------------|-------|---------------------------------|------------------------|------------------------------------|--------------------------------------------------|
| 12                 | 290.6 | 0.25         | 0.76  | 2.59                            | 50.44                  | 208.85                             | <chem>OC(=O)c1cc(oc1C(F)(F)F)c2ccc(Cl)cc2</chem> |
| 13                 | 277.7 | 0.26         | 3.78  | -0.31                           | 47.05                  | 248.79                             | <chem>Cc2nc(COC)cc(NCc1ccc(Cl)cc1)n2</chem>      |
| 14                 | 156.6 | 0.48         | 2.10  | 1.31                            | 20.23                  | 139.20                             | <chem>Clc1ccc(CCO)cc1</chem>                     |
| 15                 | 256.1 | 0.30         | 3.75  | -0.28                           | 42.35                  | 195.37                             | <chem>Oc1ccc(cc1)Oc2ncc(Cl)cc2Cl</chem>          |
| 16                 | 221.2 | 0.30         | -0.48 | 3.92                            | 77.84                  | 190.44                             | <chem>O=C2C(O)C(O)C(=O)N2Cc1cccc1</chem>         |
| 17                 | 255.0 | 0.39         | 1.96  | 1.67                            | 52.05                  | 155.80                             | <chem>Nc1cc(cc(Br)c1N)C(F)(F)F</chem>            |
| 18                 | 179.2 | 0.37         | 1.18  | 2.21                            | 33.45                  | 170.55                             | <chem>O=C(N1CCCCC1)c2ccco2</chem>                |
| 19<br>Neg. control | 201.1 | -----        | 1.94  | 1.06                            | 28.68                  | 156.72                             | <chem>FC(F)(F)c1cc2c(cc1)nnc2N</chem>            |

**Table S2: Supplemental Parameters for Table 2 (Phenylaminothiazoles)**

| Fragment ID | MW     | LE (KSHV Pr) | LogD | LipE (pIC <sub>50</sub> - LogD) | TPSA (Å <sup>2</sup> ) | Molecular Volume (Å <sup>3</sup> ) | SMILES                                                  |
|-------------|--------|--------------|------|---------------------------------|------------------------|------------------------------------|---------------------------------------------------------|
| 20          | 176.24 | n/a          | 2.52 | 0.40                            | 38.91                  | 153.30                             | <chem>Nc1nc(cs1)c2ccccc2</chem>                         |
| 21          | 336.05 | n/a          | 3.29 | -0.36                           | 38.91                  | 171.18                             | <chem>Br.Nc1nc(cs1)c2ccc(Br)cc2</chem>                  |
| 22          | 190.26 | n/a          | 3.03 | 0.08                            | 38.91                  | 169.86                             | <chem>Nc1nc(cs1)c2ccc(C)cc2</chem>                      |
| 23          | 245.12 | 0.44         | 3.73 | 0.69                            | 38.91                  | 180.37                             | <chem>Nc1nc(cs1)c2cc(Cl)c(Cl)cc2</chem>                 |
| 24          | 255.13 | 0.41         | 3.29 | 0.53                            | 38.91                  | 171.18                             | <chem>Nc1nc(cs1)c2cc(Br)ccc2</chem>                     |
| 25          | 326.37 | 0.28         | 1.72 | 2.80                            | 71.45                  | 278.37                             | <chem>O=C(O)c1cc(ccc1)Nc2nc(cs2)c3ccc(OC)cc3</chem>     |
| 26          | 456.15 | 0.30         | 2.64 | 2.03                            | 62.22                  | 270.70                             | <chem>Br.O=C(O)c1cc(ccc1)Nc2nc(cs2)c3ccc(Br)cc3</chem>  |
| 27          | 330.79 | 0.27         | 2.45 | 1.85                            | 62.22                  | 266.36                             | <chem>O=C(O)c1cc(ccc1)Nc2nc(cs2)c3ccc(Cl)cc3</chem>     |
| 28          | 330.79 | 0.31         | 2.36 | 2.56                            | 62.22                  | 266.36                             | <chem>O=C(O)c3ccc(Nc1nc(cs1)c2ccc(Cl)cc2)cc3</chem>     |
| 29          | 375.24 | 0.30         | 2.53 | 2.15                            | 62.22                  | 270.70                             | <chem>O=C(O)c3ccc(Nc1nc(cs1)c2ccc(Br)cc2)cc3</chem>     |
| 30          | 365.23 | 0.31         | 3.08 | 2.09                            | 62.22                  | 279.89                             | <chem>O=C(O)c1cc(ccc1)Nc2nc(cs2)c3ccc(Cl)c(Cl)c3</chem> |

| Fragment ID | MW     | LE (KSHV Pr) | LogD | LipE (pIC <sub>50</sub> - LogD) | TPSA (Å <sup>2</sup> ) | Molecular Volume (Å <sup>3</sup> ) | SMILES                                                  |
|-------------|--------|--------------|------|---------------------------------|------------------------|------------------------------------|---------------------------------------------------------|
| 31          | 365.23 | 0.31         | 2.96 | 2.21                            | 62.22                  | 279.89                             | <chem>O=C(O)c3ccc(Nc1nc(cs1)c2ccc(Cl)c(Cl)c2)cc3</chem> |
| 32          | 296.34 | 0.24         | 1.76 | 1.82                            | 62.22                  | 252.82                             | <chem>O=C(O)c3ccc(Nc1nc(cs1)c2ccccc2)cc3</chem>         |
| 33          | 442.17 | 0.25         | 5.40 | -1.72                           | 34.15                  | 269.25                             | <chem>Br.BrC1ccc(cc1)c3csc(Nc2cc(OC)ccc2)n3</chem>      |
| 34          | 456.15 | 0.22         | 5.18 | -1.72                           | 43.39                  | 267.63                             | <chem>Br.BrC1ccc(cc1)c4csc(Nc2cc3OCOc3cc2)n4</chem>     |

**Table S3: Indoles**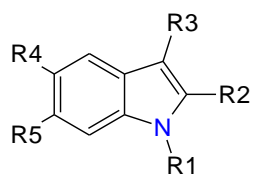

| Fragment ID | R1                                                | R2 | R3 | R4 | R5 | KSHV Pr IC <sub>50</sub> (μM) | MW     | LE   |
|-------------|---------------------------------------------------|----|----|----|----|-------------------------------|--------|------|
| 35          | CH <sub>3</sub>                                   |    | H  | H  | Cl | 412.0                         | 370.84 | 0.18 |
| 36          |                                                   | H  | H  | H  | Cl | 466.0                         | 291.78 | 0.23 |
| 37          | CH <sub>2</sub> CO <sub>2</sub> H                 | H  | H  | H  | Br | > 500                         | 254.08 | 0.33 |
| 38          | H                                                 |    | H  | H  | Br | > 500                         | 254.08 | 0.33 |
| 39          |                                                   | H  | H  | H  | Br | > 500                         | 336.23 | 0.22 |
| 40          | CH <sub>2</sub> CH <sub>2</sub> CO <sub>2</sub> H | H  | H  | H  | Br | > 500                         | 268.11 | 0.28 |
| 41          | H                                                 | H  |    | Br | H  | > 500                         | 224.06 | 0.36 |

| Fragment ID | LogD  | LipE | TPSA (Å <sup>2</sup> ) | Molecular Volume (Å <sup>3</sup> ) | SMILES                                                  |
|-------------|-------|------|------------------------|------------------------------------|---------------------------------------------------------|
| 35          | 2.53  | 0.86 | 60.26                  | 320.54                             | <chem>O=C(c2cc1ccc(Cl)cc1n2C)N4CCC(Oc3ncccn3)CC4</chem> |
| 36          | 1.68  | 1.65 | 28.48                  | 261.22                             | <chem>O=C(Cn2ccc1ccc(Cl)cc12)N3CCN(C)C3</chem>          |
| 37          | -0.88 | 4.15 | 42.23                  | 175.09                             | <chem>O=C(O)Cn2ccc1ccc(Br)cc12</chem>                   |
| 38          | 2.76  | 0.51 | 42.10                  | 175.44                             | <chem>O=C(OC)c1cc2ccc(Br)cc2n1</chem>                   |
| 39          | 1.93  | 1.21 | 28.48                  | 265.57                             | <chem>O=C(Cn2ccc1ccc(Br)cc12)N3CCN(C)C3</chem>          |
| 40          | -0.53 | 3.55 | 42.23                  | 191.89                             | <chem>O=C(O)CCn2ccc1ccc(Br)cc12</chem>                  |
| 41          | 2.55  | 0.58 | 32.86                  | 149.89                             | <chem>Brc1cc2c(cc1)ncc2C=O</chem>                       |

**Table S4: Trifluoromethylbenzenes**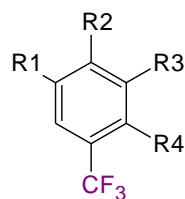

| Fragment ID | R1              | R2              | R3              | R4 | KSHV Pr IC <sub>50</sub> (μM) | MW     | LE   | LogD | LipE  | TPSA (Å <sup>2</sup> ) | Molecular Volume (Å <sup>3</sup> ) | SMILES                              |
|-------------|-----------------|-----------------|-----------------|----|-------------------------------|--------|------|------|-------|------------------------|------------------------------------|-------------------------------------|
| 42          | Br              |                 | H               | H  | 221                           | 310.11 | 0.30 | 3.51 | 0.15  | 12.47                  | 211.36                             | FC(F)(F)c1cc(Br)c(c1)N2CCOCC2       |
| 43          | Br              | NH <sub>2</sub> | H               | H  | 336                           | 240.02 | 0.41 | 2.79 | 0.68  | 26.02                  | 144.51                             | Nc1ccc(cc1Br)C(F)(F)F               |
| 44          | H               |                 | H               | H  | > 500                         | 273.70 | 0.25 | 3.03 | 0.18  | 33.12                  | 214.69                             | FC(F)(F)c1ccc(cc1)c2nc(C)c(CO)s2    |
| 45          | H               | H               |                 | H  | > 500                         | 268.24 | 0.24 | 2.63 | 0.56  | 63.83                  | 218.69                             | Cc2cc(Nc1cc(ccc1)C(F)(F)F)nc(N)n2   |
| 46          | NO <sub>2</sub> | NH <sub>2</sub> | H               | Cl | > 500                         | 240.57 | 0.30 | 3.22 | -0.05 | 71.85                  | 163.50                             | FC(F)(F)c1cc(c(N)c1Cl)[N+][O-]=O    |
| 47          | H               | Br              | NH <sub>2</sub> | H  | > 500                         | 240.02 | 0.37 | 2.79 | 0.37  | 26.02                  | 144.51                             | Nc1cc(ccc1Br)C(F)(F)F               |
| 48          |                 | H               | H               | H  | > 500                         | 280.25 | 0.21 | 3.11 | -0.11 | 55.12                  | 229.42                             | O=C(Nc1cc(ccc1)C(F)(F)F)c2ccc(N)cc2 |



| Fragment ID | R1                                                                                | R2                                                                                | R3              | R4 | KSHV Pr IC <sub>50</sub> (μM) | MW     | LE   | LogD | LipE  | TPSA (Å <sup>2</sup> ) | Molecular Volume (Å <sup>3</sup> ) | SMILES                             |
|-------------|-----------------------------------------------------------------------------------|-----------------------------------------------------------------------------------|-----------------|----|-------------------------------|--------|------|------|-------|------------------------|------------------------------------|------------------------------------|
| 49          | 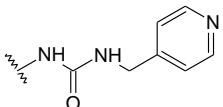 | H                                                                                 | H               | H  | > 500                         | 295.27 | 0.20 | 2.48 | 0.52  | 54.02                  | 243.18                             | FC(F)(F)c1cc(ccc1)NC(=O)NCc2ccncc2 |
| 50          | Br                                                                                | H                                                                                 | CH <sub>3</sub> | H  | > 500                         | 239.04 | 0.32 | 4.13 | -1.42 | 0.00                   | 149.79                             | FC(F)(F)c1cc(C)cc(Br)c1            |
| 51          | NH <sub>2</sub>                                                                   | NH <sub>2</sub>                                                                   | H               | H  | > 500                         | 176.14 | 0.31 | 1.19 | 1.47  | 52.05                  | 137.92                             | Nc1ccc(cc1N)C(F)(F)F               |
| 52          | Br                                                                                | H                                                                                 | H               | H  | > 500                         | 225.01 | 0.30 | 3.62 | -1.26 | 0.00                   | 133.23                             | FC(F)(F)c1cc(Br)ccc1               |
| 53          | Br                                                                                | CH <sub>3</sub>                                                                   | H               | H  | > 500                         | 239.04 | 0.27 | 4.13 | -1.86 | 0.00                   | 149.79                             | Cc1ccc(cc1Br)C(F)(F)F              |
| 54          | Cl                                                                                |  | H               | H  | > 500                         | 251.63 | 0.18 | 3.39 | -1.34 | 29.10                  | 193.63                             | Clc1cc(ccc1NC(=O)CC)C(F)(F)F       |

**Table S5: Tetrahydrobenzothienopyrimidines**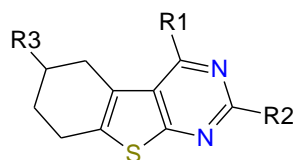

| Fragment ID     | R1 | R2              | R3              | KSHV Pr IC <sub>50</sub> (μM) | MW     | LE   | LogD | LipE  | TPSA (Å <sup>2</sup> ) | Molecular Volume (Å <sup>3</sup> ) | SMILES                                                           |
|-----------------|----|-----------------|-----------------|-------------------------------|--------|------|------|-------|------------------------|------------------------------------|------------------------------------------------------------------|
| 55              |    | H               | H               | 71.3                          | 248.34 | 0.34 | 4.09 | 0.06  | 35.02                  | 225.73                             | <chem>CC(C)Oc2ncnc1sc3CCCCc3c12</chem>                           |
| 56*             |    | CH <sub>3</sub> | H               | 85.1                          | 379.43 | 0.28 | 3.85 | 0.22  | 38.26                  | 261.50                             | <chem>O=C(O)C(=O)O.Cc1nc(c2c(n1)sc3CCCCc23)N4CCOCC4</chem>       |
| 57 <sup>‡</sup> |    | CH <sub>3</sub> | H               | 136.0                         | 459.01 | 0.18 | 5.20 | -1.33 | 50.73                  | 377.43                             | <chem>Cl.Cc1nc(c2c(n1)sc3CCCCc23)N6CCN(Cc4ccc5OCOc5c4)CC6</chem> |
| 58              | OH | H               | H               | > 500                         | 206.26 | 0.32 | 3.17 | 0.04  | 46.01                  | 174.82                             | <chem>Oc2ncnc1sc3CCCCc3c12</chem>                                |
| 59              | OH | H               | CH <sub>3</sub> | > 500                         | 220.29 | 0.19 | 3.46 | -1.41 | 46.01                  | 191.40                             | <chem>Oc2ncnc1sc3CCC(C)Cc3c12</chem>                             |

\* Contains: ethanedioate

‡ Contains: HCl

**Table S6: Tetrahydrodibenzofurans**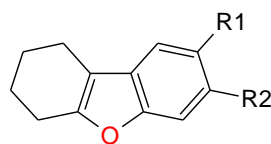

| Fragment ID | R1 | R2              | KSHV Pr IC <sub>50</sub> (μM) | MW     | LE   | LogD  | LipE | TPSA (Å <sup>2</sup> ) | Molecular Volume (Å <sup>3</sup> ) | SMILES                            |
|-------------|----|-----------------|-------------------------------|--------|------|-------|------|------------------------|------------------------------------|-----------------------------------|
| 60          |    | H               | > 500                         | 246.26 | 0.25 | -0.37 | 3.57 | 59.67                  | 218.76                             | O=C(O)COc1cc2c(cc1)oc3CCCCc23     |
| 61          |    | CH <sub>3</sub> | > 500                         | 279.35 | 0.23 | 2.23  | 0.69 | 59.31                  | 242.92                             | CS(=O)(=O)Nc1cc2c(cc1C)oc3CCCCc23 |

**Table S7: Tetrahydrocyclopentaindole**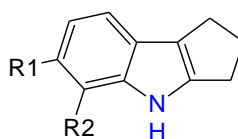

| Fragment ID | R1 | R2 | KSHV Pr IC <sub>50</sub> (μM) | MW     | LE   | LogD | LipE | TPSA (Å <sup>2</sup> ) | Molecular Volume (Å <sup>3</sup> ) | SMILES                   |
|-------------|----|----|-------------------------------|--------|------|------|------|------------------------|------------------------------------|--------------------------|
| 62          | Cl | Cl | 76.0                          | 226.10 | 0.41 | 4.05 | 0.07 | 15.79                  | 179.66                             | Clc3ccc1c(nc2CCCC12)c3Cl |

**Table S8: Michaelis-Menten parameters, KSHV Pr, P6R substrate + Fragment 30**

| [Fragment 30], $\mu\text{M}$ | $V_{\text{max}}$ ( $\mu\text{M}/\text{sec}$ ) | $K_m$ ( $\mu\text{M}$ ) |
|------------------------------|-----------------------------------------------|-------------------------|
| 0.00                         | $(32.69 \pm 3.08) \times 10^{-5}$             | $11.34 \pm 2.33$        |
| 1.56                         | $(26.39 \pm 2.88) \times 10^{-5}$             | $9.80 \pm 2.49$         |
| 3.13                         | $(23.86 \pm 3.32) \times 10^{-5}$             | $12.24 \pm 3.58$        |
| 6.25                         | $(14.05 \pm 1.82) \times 10^{-5}$             | $6.42 \pm 2.40$         |
| 12.5                         | $(8.87 \pm 1.84) \times 10^{-5}$              | $8.43 \pm 4.39$         |
| 25.0                         | $(5.84 \pm 7.53) \times 10^{-5}$              | $23.52 \pm 49.27$       |

Figure S1

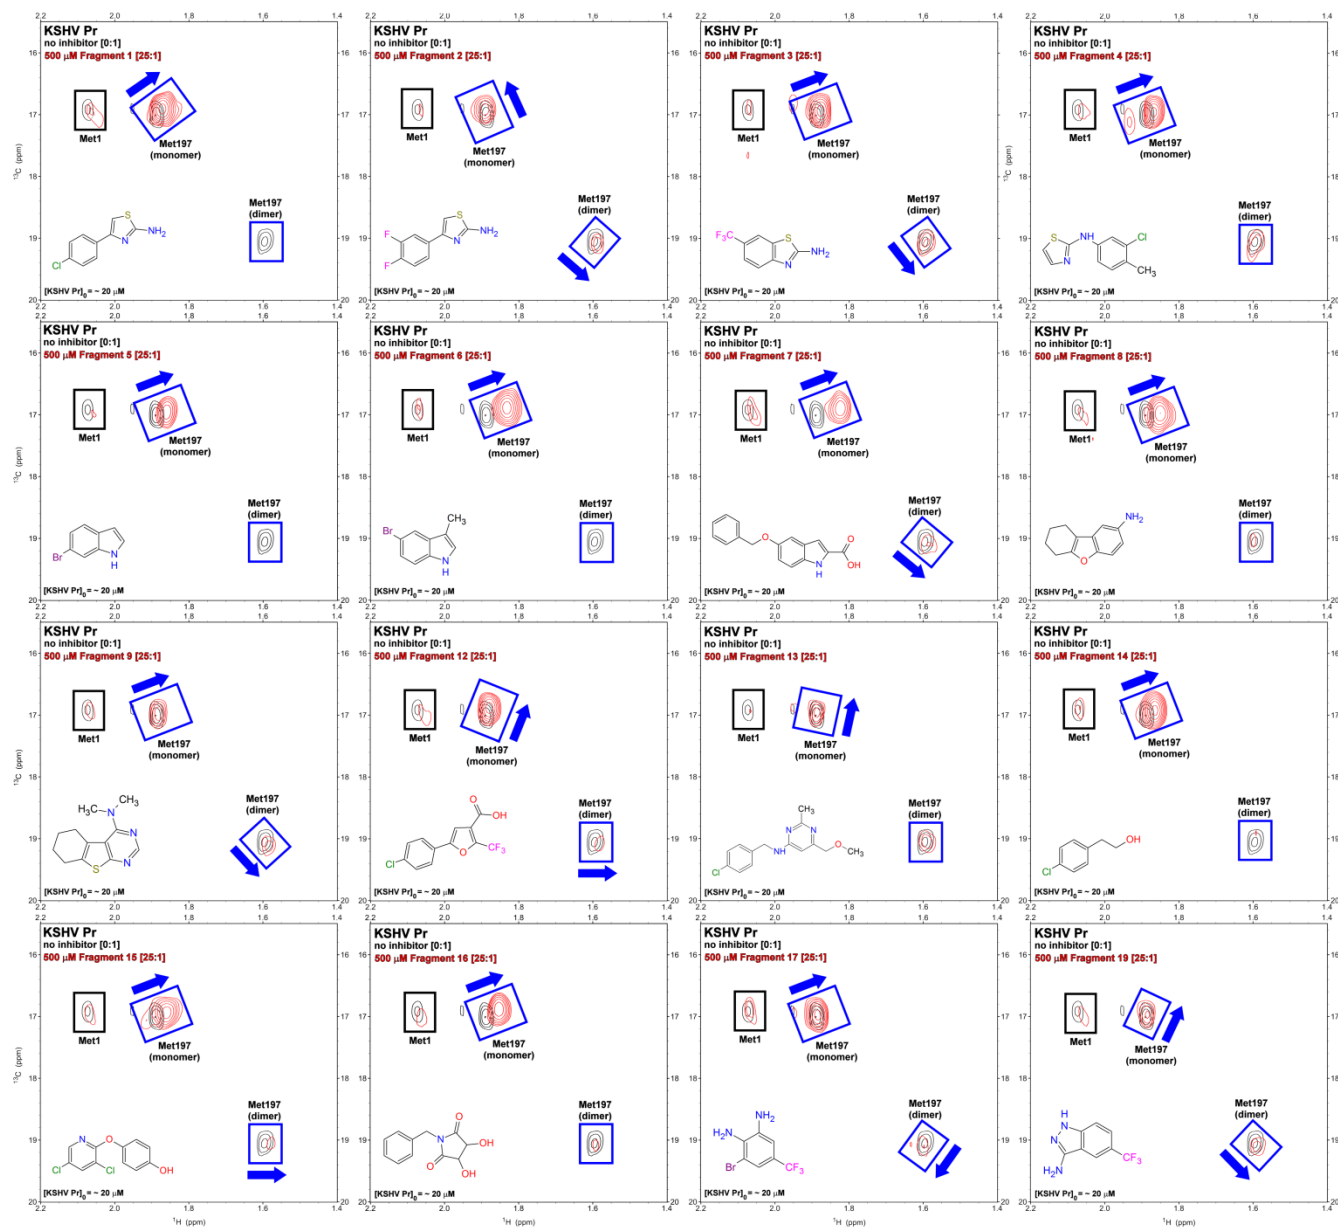

Figure S1:

Overlays of the  $^{13}\text{C}/^1\text{H}$ -HSQC spectra of selectively  $^{13}\text{C}$ -methionine labeled wild-type KSHV Pr in the absence (black) and presence (red) of 25x molar excess of the Table 1 fragments. Loss of intensity of the M197 dimer peak with a concomitant shift of the M197 monomer peak are hallmarks of dimer disruption.

Figure S2

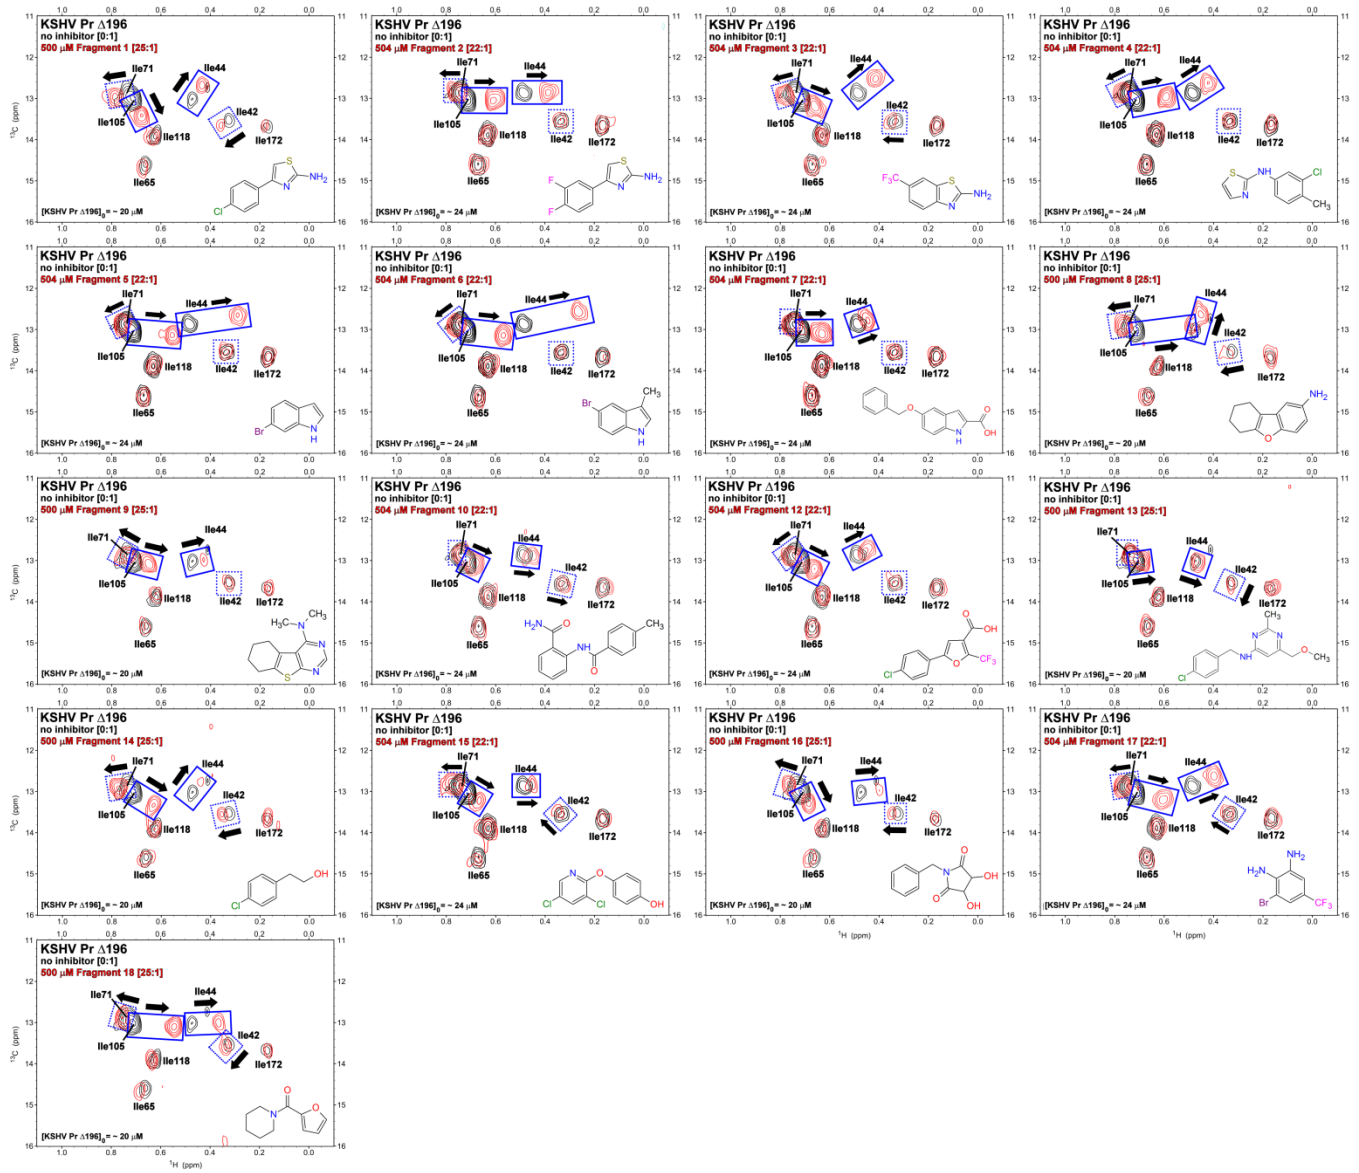

Figure S2:

Overlays of the  $^{13}\text{C}/^1\text{H}$ -HSQC spectra of selectively  $^{13}\text{C}$ -Isoleucine labeled KSHV Pr  $\Delta 196$  in the absence (black) and presence (red) of 20 - 25x molar excess of the Table 1 fragments. Perturbations of the Ile44 and Ile105 methyl group resonances indicate fragment binding at the dimer interface near the hot spot Trp109.

Figure S3A

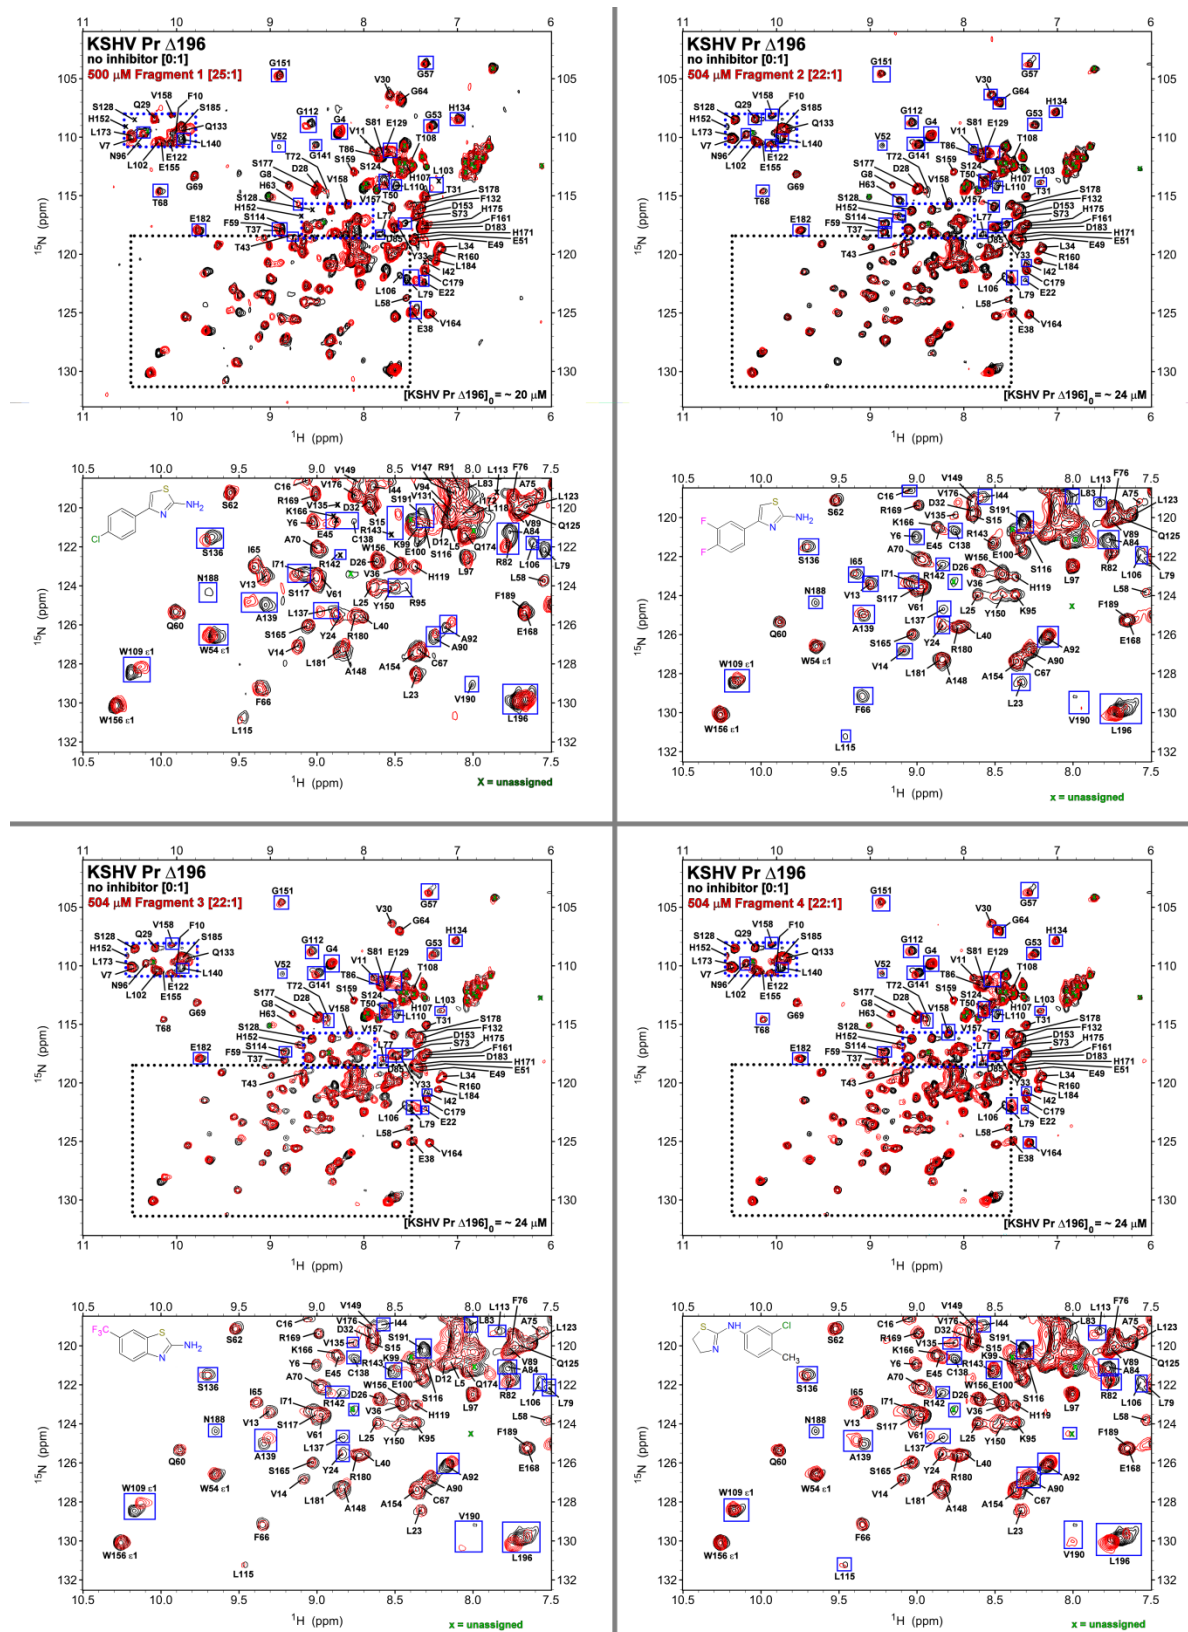

Figure S3B

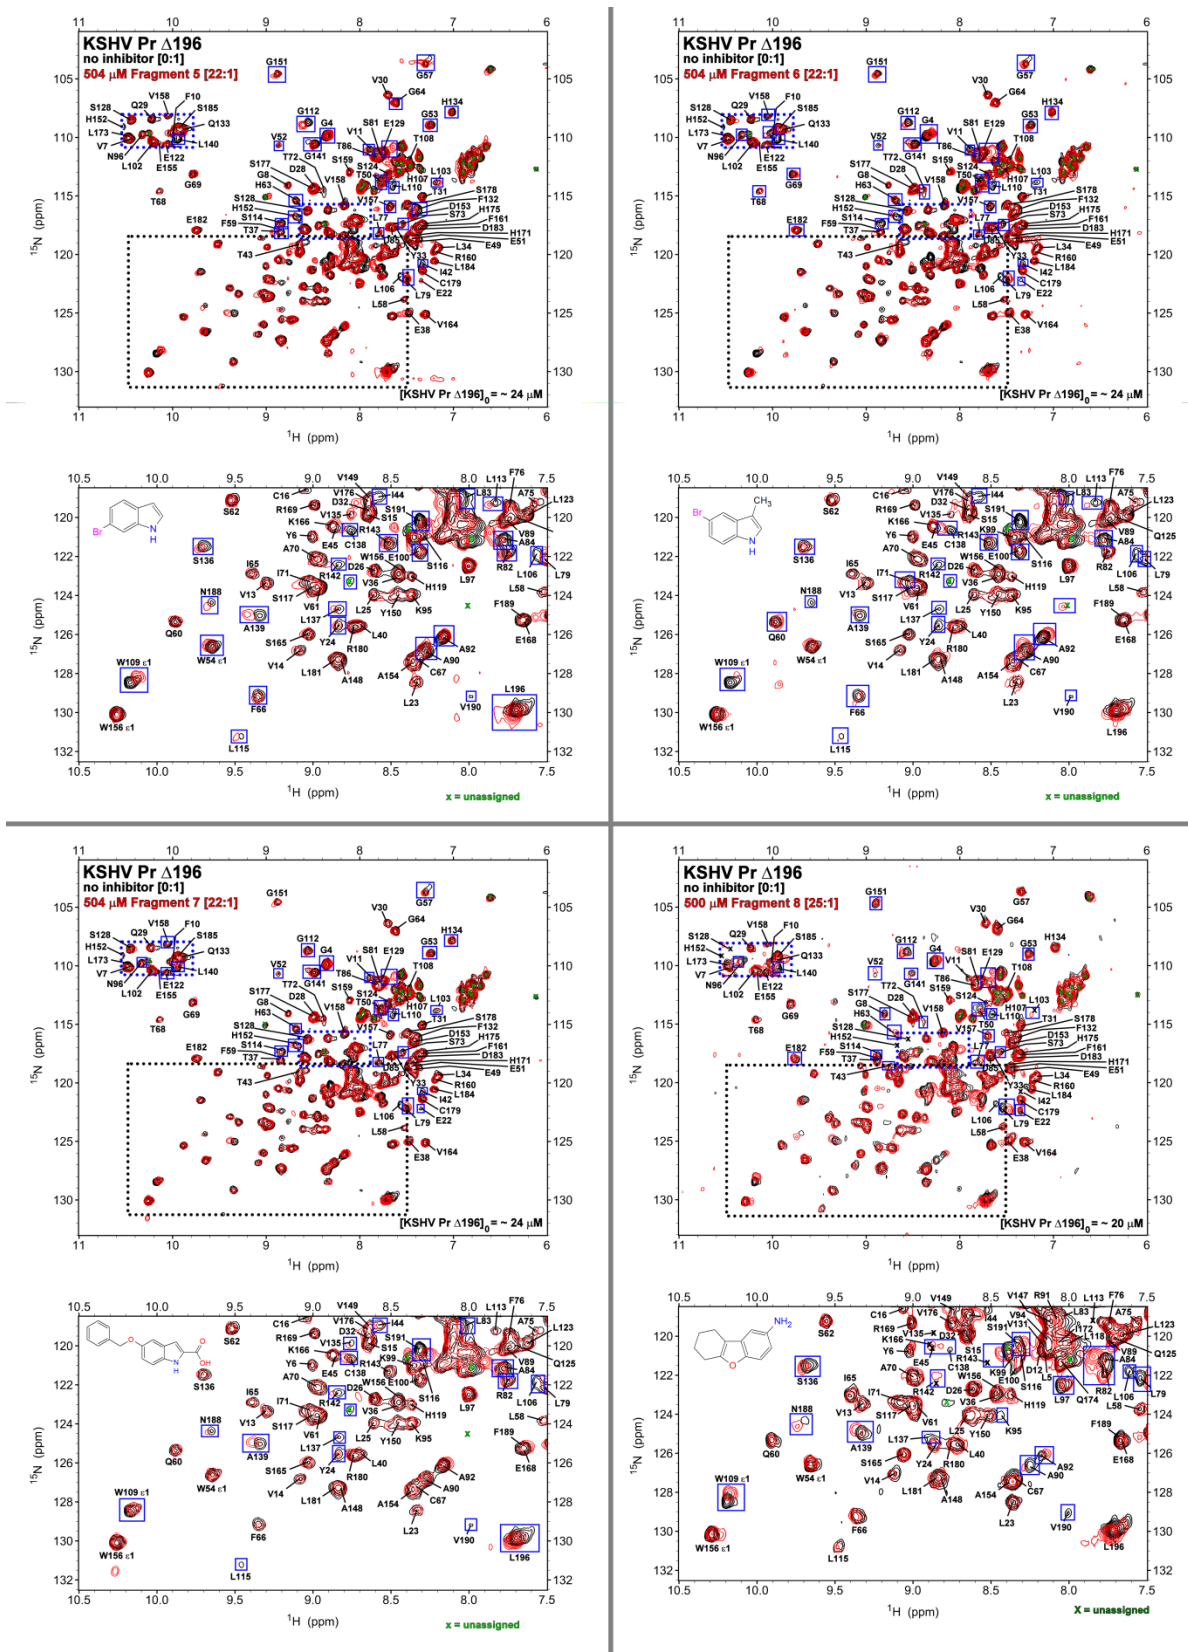



Figure S3C

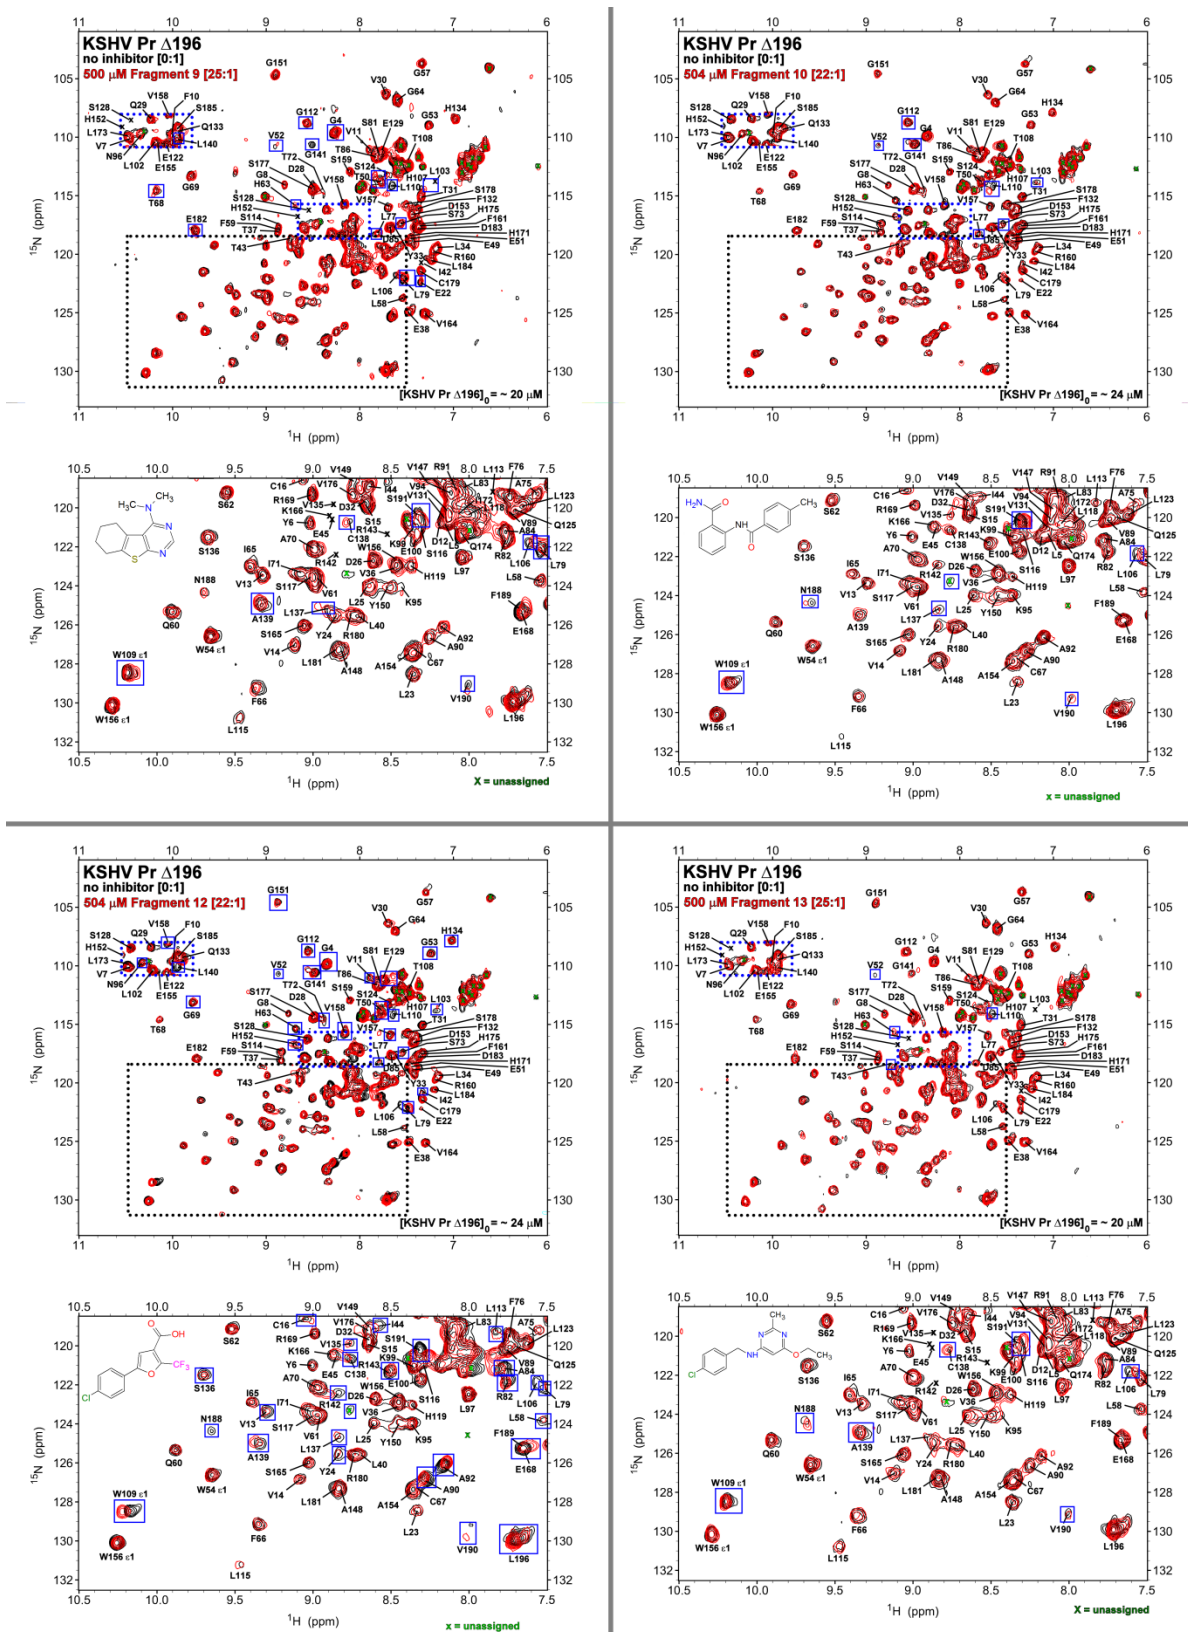

Figure S3D

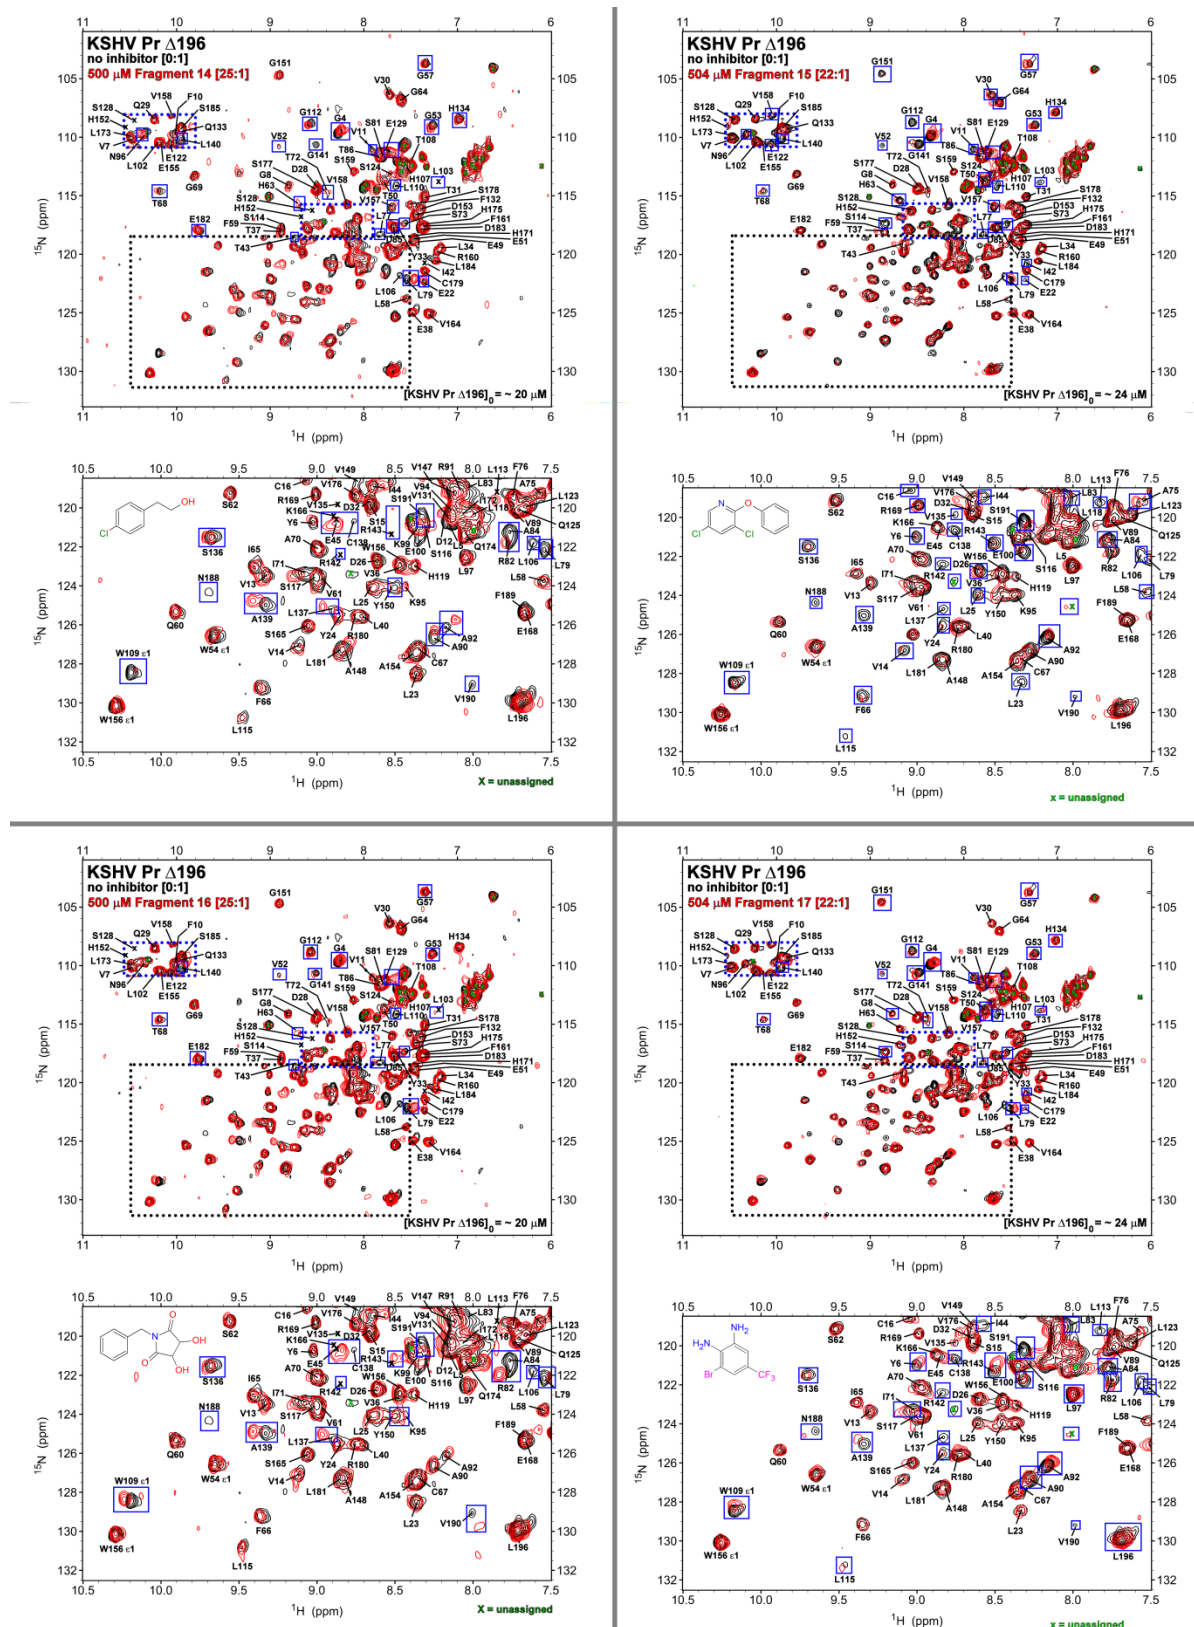

Figure S3E

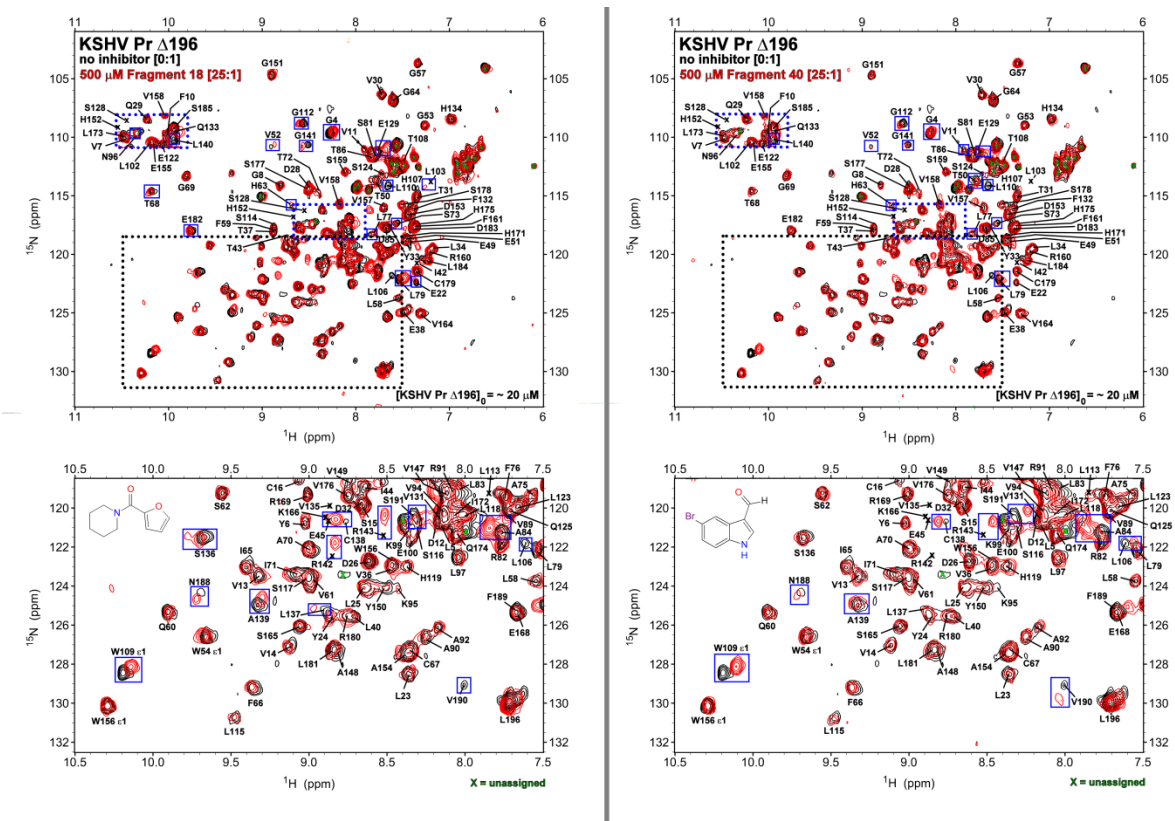**Figures S3A-S3E:**

Overlays of the  $^{15}\text{N}/^1\text{H}$ -HSQC spectra of uniformly  $^{15}\text{N}$ -labeled KSHV Pr  $\Delta 196$  in the absence (black) and presence (red) of 20 - 25x molar excess of the Table 1 fragments. Top half of each panel: full  $^{15}\text{N}/^1\text{H}$ -HSQC spectra with the crowded middle resonances (blue dotted panel) at the inset. The black dotted regions of the spectra are zoomed in the lower half of each panel.

Figure S4

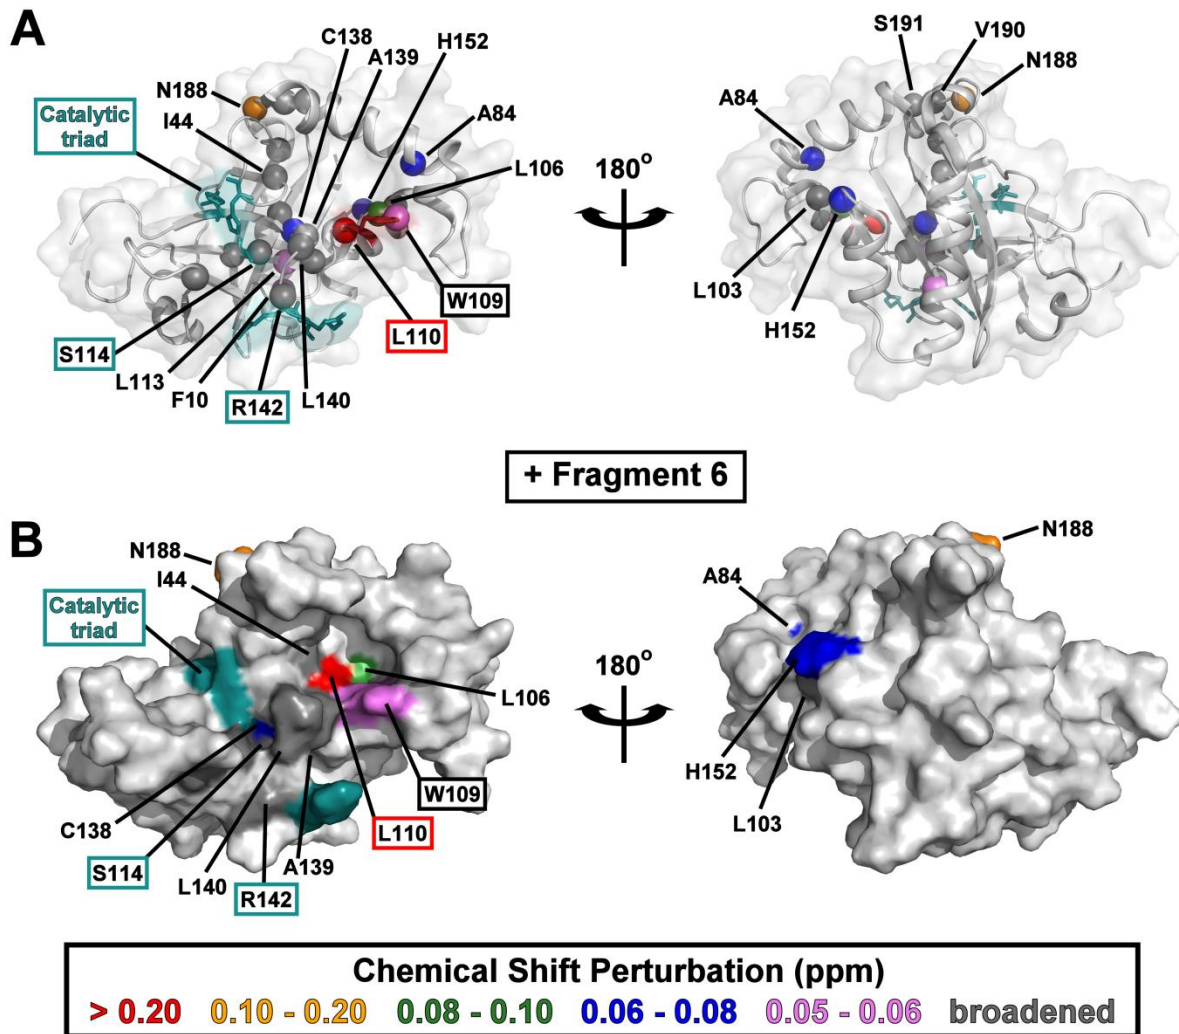**Figure S4:**

The structure of monomeric KSHV Pr  $\Delta$ 196 (PDB: 3NJQ) with the  $^{15}\text{N}/^1\text{H}$ -HSQC chemical shift perturbations for Fragment 6 indicated by color. Backbone amide resonances which displayed peak broadening upon addition of fragments are indicated in dark gray. Amide backbone nitrogen atoms are shown as colored spheres in (a), while surfaces are displayed in (b). The catalytic triad (His46, Ser114, and His134) and oxanyon hole (Arg142 and Arg143) residues are highlighted in cyan. Left and right structures are rotated  $180^\circ$  about the vertical axis.

Figure S5

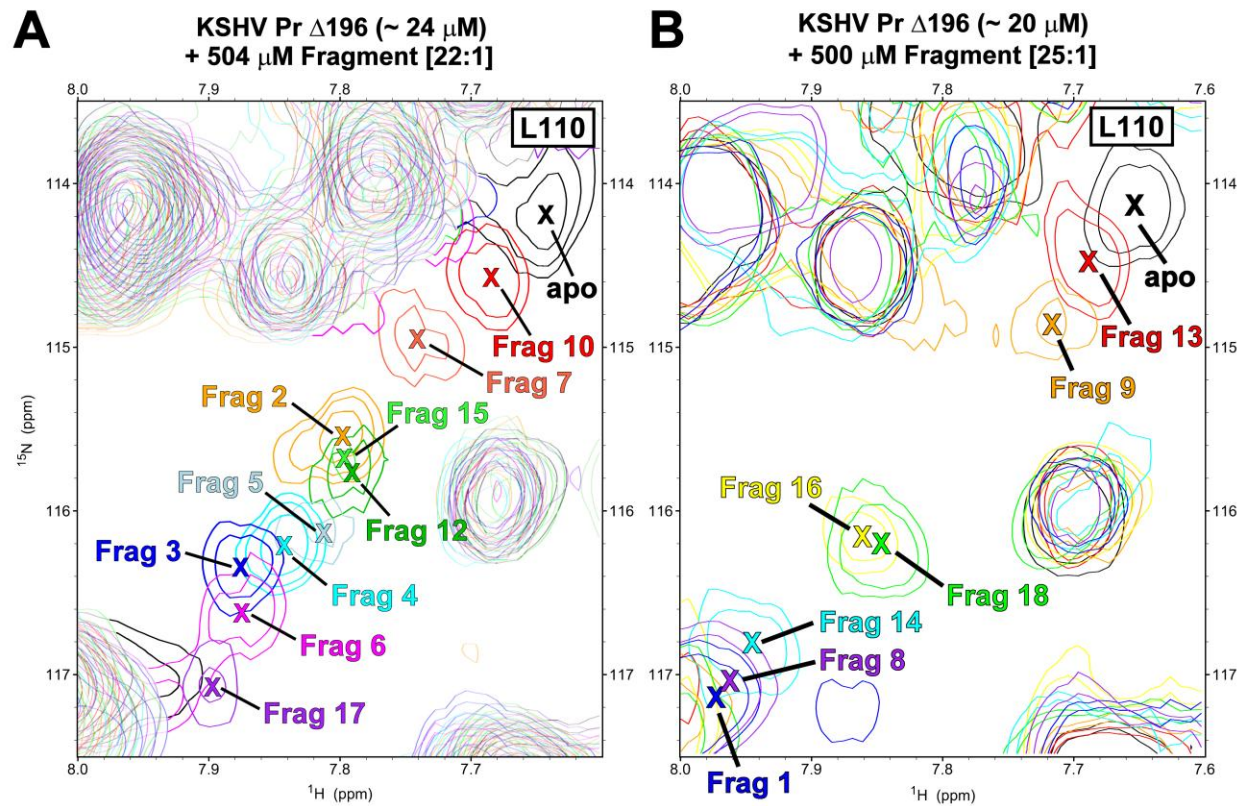**Figure S5:**

Backbone  $^{15}\text{N}/^1\text{H}$ -HSQC spectra of KSHV Pr  $\Delta 196$  in the absence (black) and presence (colors) of 20-25x molar excess Table 1 Fragments, focusing on the Leu110 backbone amide peak. (A) Apo vs. Fragments 2 - 7, 10, 12, 15, and 17. (B) Apo vs. Fragments 1, 8, 9, 13, 14, 16, and 18. The linear nature of the chemical shift perturbations observed for the Leu110 amide peak are likely influenced more by the rotameric effects of the Trp109 indole conformation than to direct binding interactions with the fragments.

Figure S6

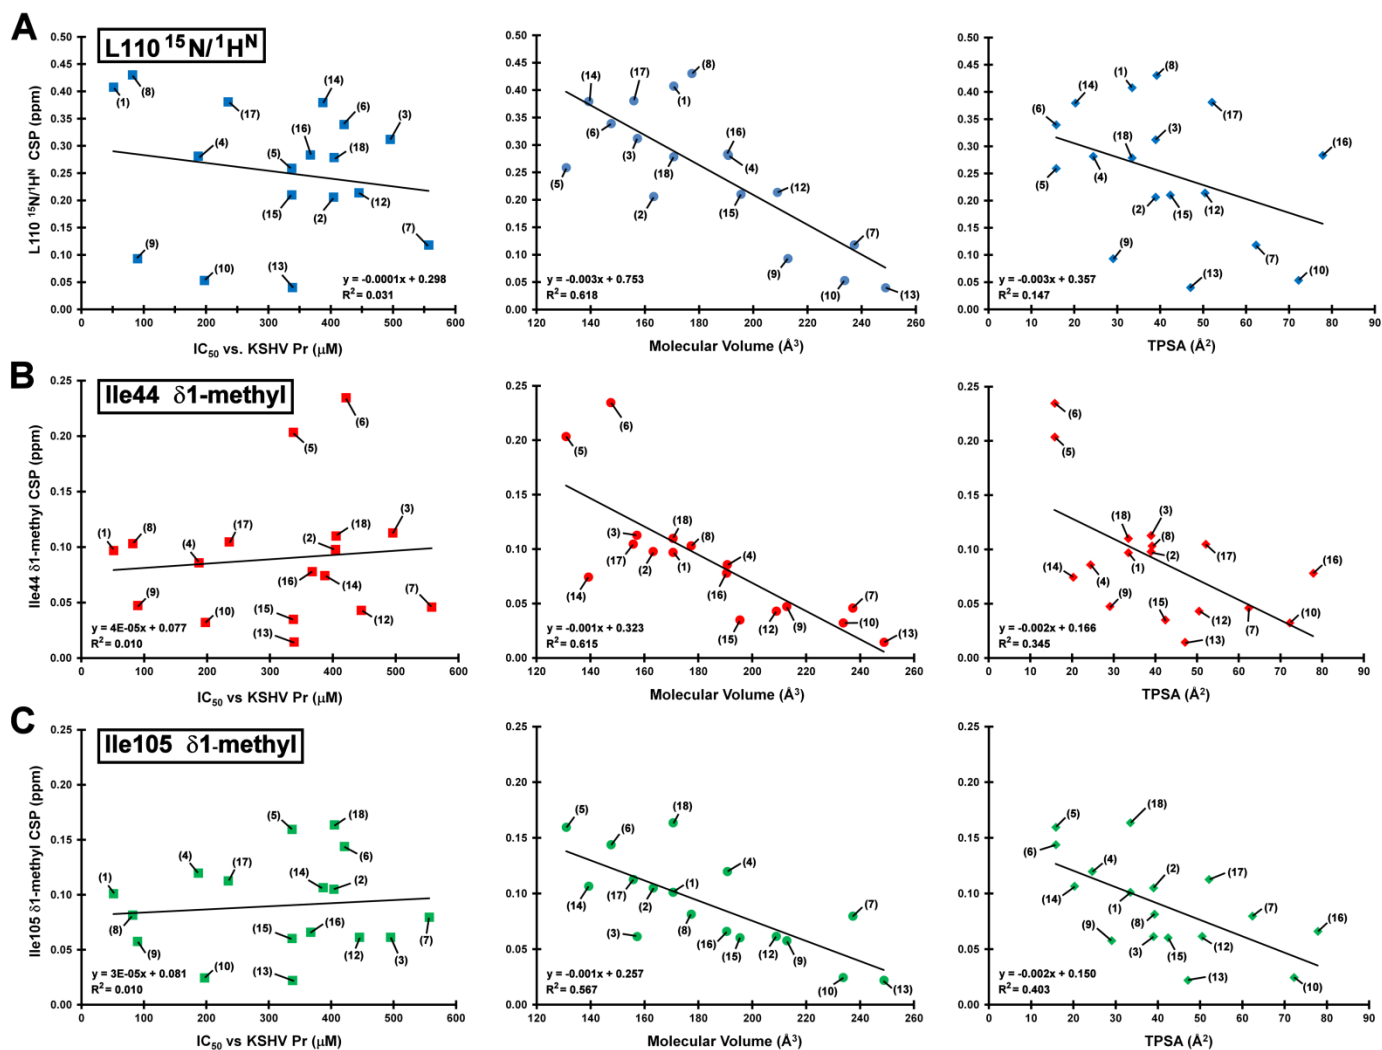**Figure S6:**

Chemical shift perturbations (CSP) plotted against (**left**)  $\text{IC}_{50}$  against KSHV Pr, (**middle**) molecular volume, and (**right**) total polar surface area (TPSA) of the Table 1 Fragments. (**A**) Leu110 backbone amide CSPs. (**B**) Ile44  $\delta^1$ -methyl CSPs. (**C**) Ile105  $\delta^1$ -methyl CSPs. Table 1 Fragment numbers are indicated. The best correlations are for the molecular volume, indicating that smaller fragments have a larger effect on the CSP, regardless of its chemical scaffold.

Figure S7

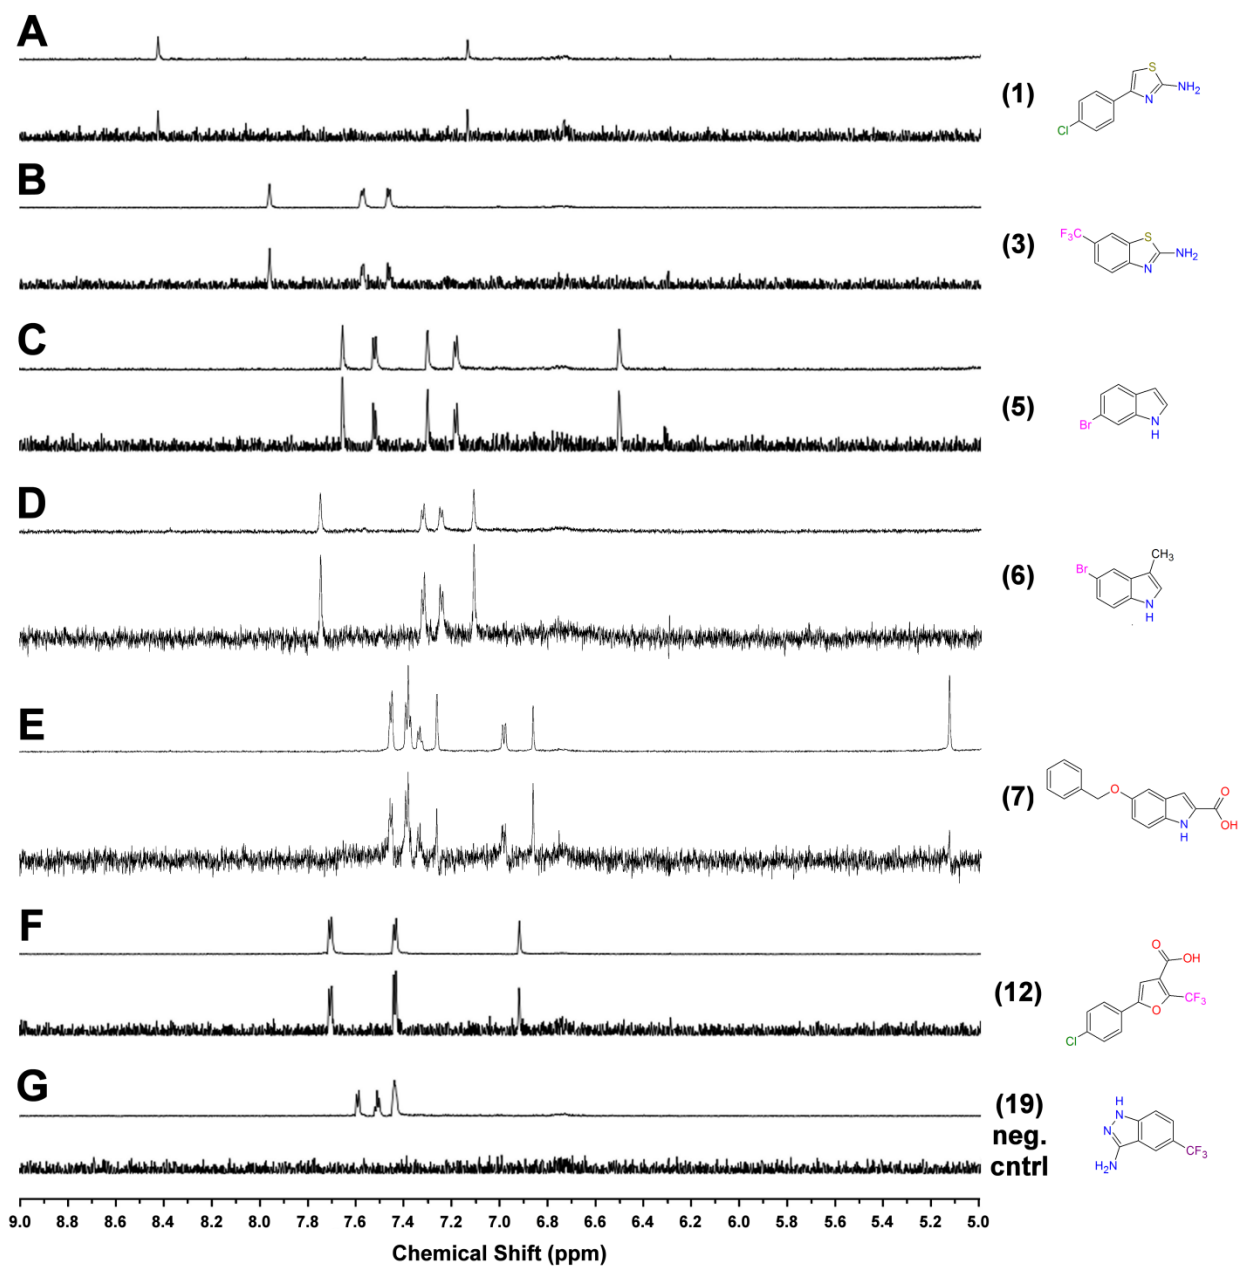

Figure S7:

The 1D-STD NMR spectra of Fragments (A) 1, (B) 3, (C) 5, (D) 6, (E) 7, (F) 12, and (G) 19, focusing on the aromatic region of the  $^1\text{H}$  spectrum. The top portion of each pair is the off-resonance (control) experiment, while the bottom corresponds to the difference spectrum. The on-resonance pulse was set to 0.9 ppm. Fragment 19 acts as the negative control.

Figure S8

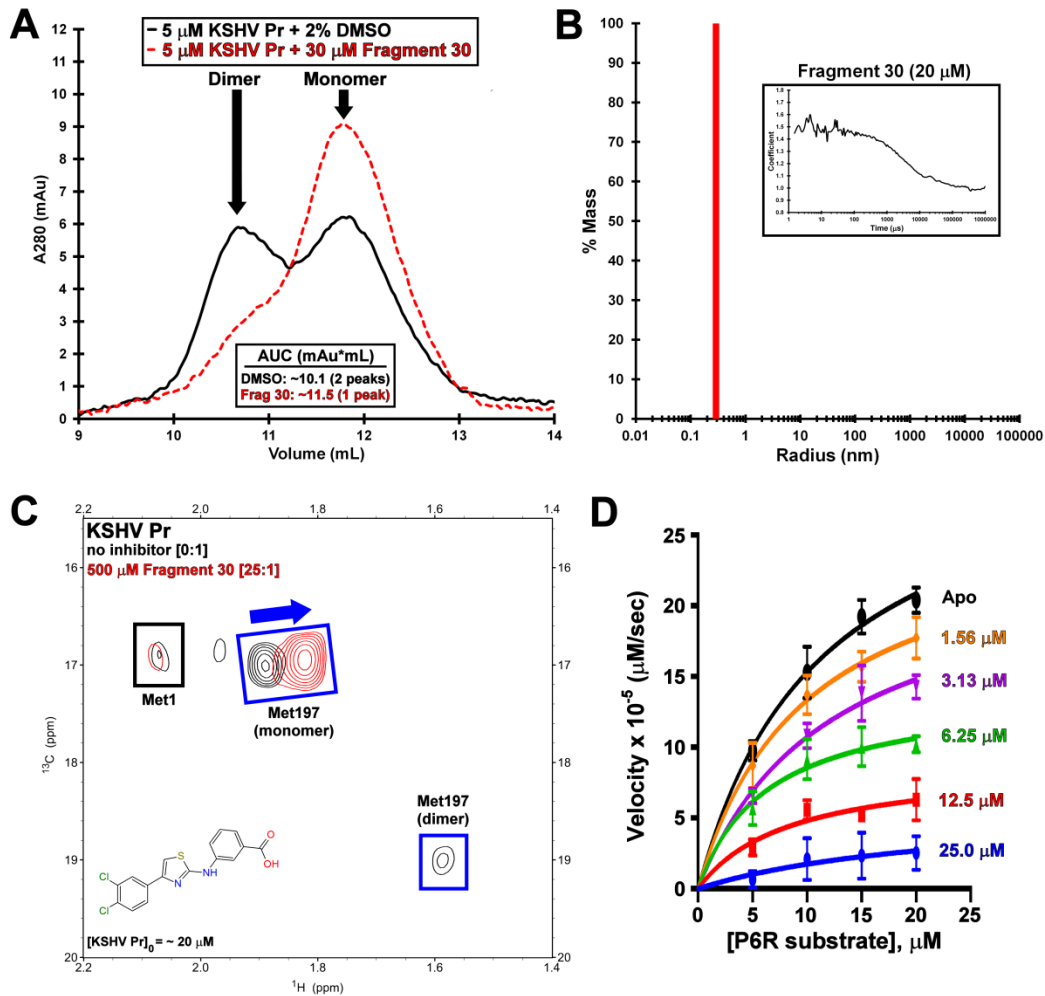

Figure S8:

(a) Overlays of analytical size-exclusion chromatograms of 5  $\mu\text{M}$  KSHV Pr with 2% DMSO (black) and 30  $\mu\text{M}$  Fragment 30 (dotted red). The KSHV Pr displays a nearly 1:1 mixture of dimeric and monomeric states under the control conditions. Addition of Fragment 30 shifts the equilibrium to the monomeric state. (b) Dynamic light scattering data for 20  $\mu\text{M}$  Fragment 30 in enzyme assay buffer indicates no aggregate formation. In the inset is the raw autocorrelation curve. (c) Overlays of the  $^{13}\text{C}/^1\text{H}$ -HSQC spectra of selectively  $^{13}\text{C}$ -methionine labeled KSHV Pr in the absence (black) and presence (red) of ~25x molar excess of Fragment 30 validate the size-exclusion chromatogram results. (d) Michaelis-Menten binding curves for KSHV Pr + P6R substrate with varying concentrations of Fragment 30, as indicated.



Figure S9

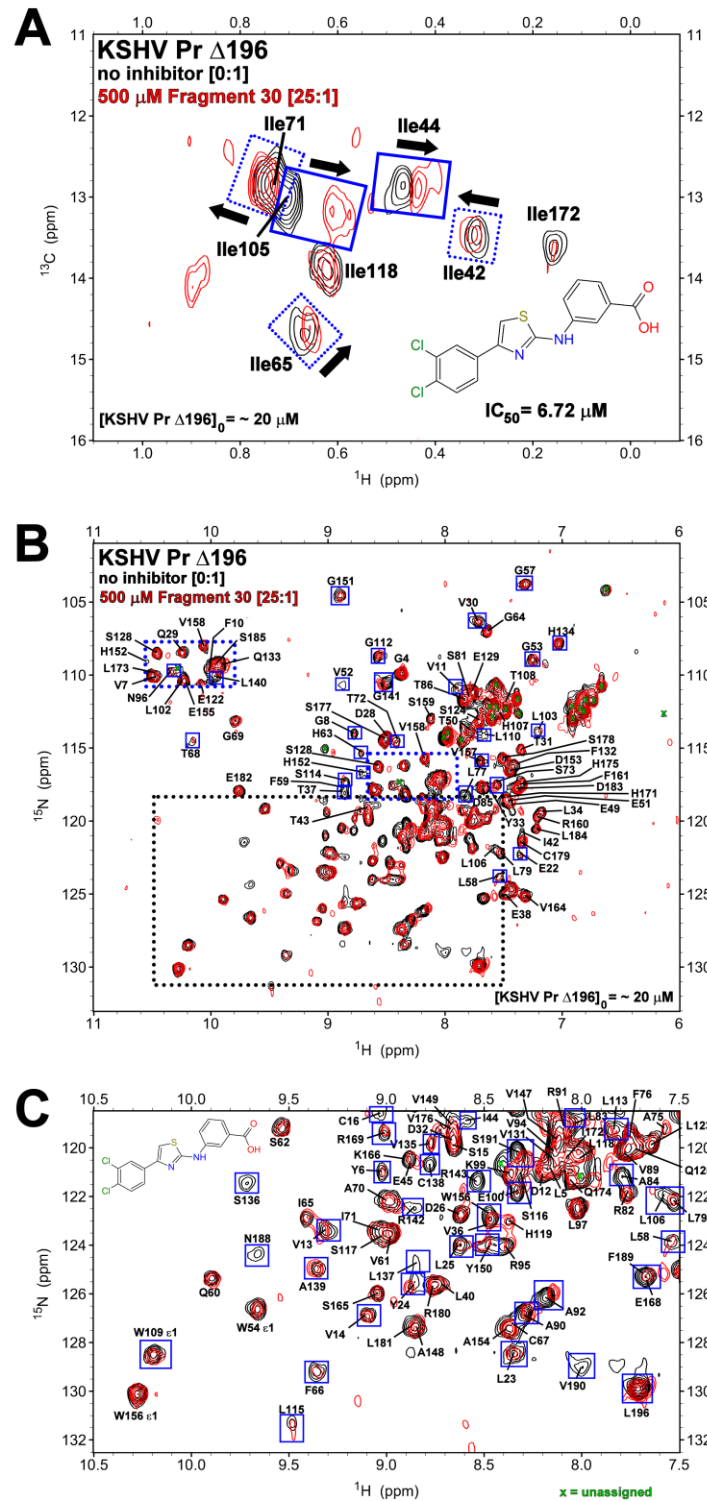

Figure S9:

(a) Overlays of the  $^{13}\text{C}/^1\text{H}$ -HSQC spectra of selectively  $^{13}\text{C}$ -Isoleucine labeled KSHV Pr  $\Delta 196$  in the absence (black) and presence (red) of  $\sim 25\text{x}$  molar excess of Fragment **30** (Table 2). Perturbations of the Ile44 and Ile105 methyl group resonances indicate fragment binding at the dimer interface near the hot spot Trp109.

(b) Overlays of the  $^{15}\text{N}/^1\text{H}$ -HSQC spectra of uniformly  $^{15}\text{N}$ -labeled KSHV Pr  $\Delta 196$  in the absence (black) and presence (red) of  $\sim 25\text{x}$  molar excess of Fragment **30** (Table 2). The crowded middle resonances (blue dotted panel) are at the inset.

(c) Zoomed view of the black dotted regions of the spectra from panel (b).

Figure S10

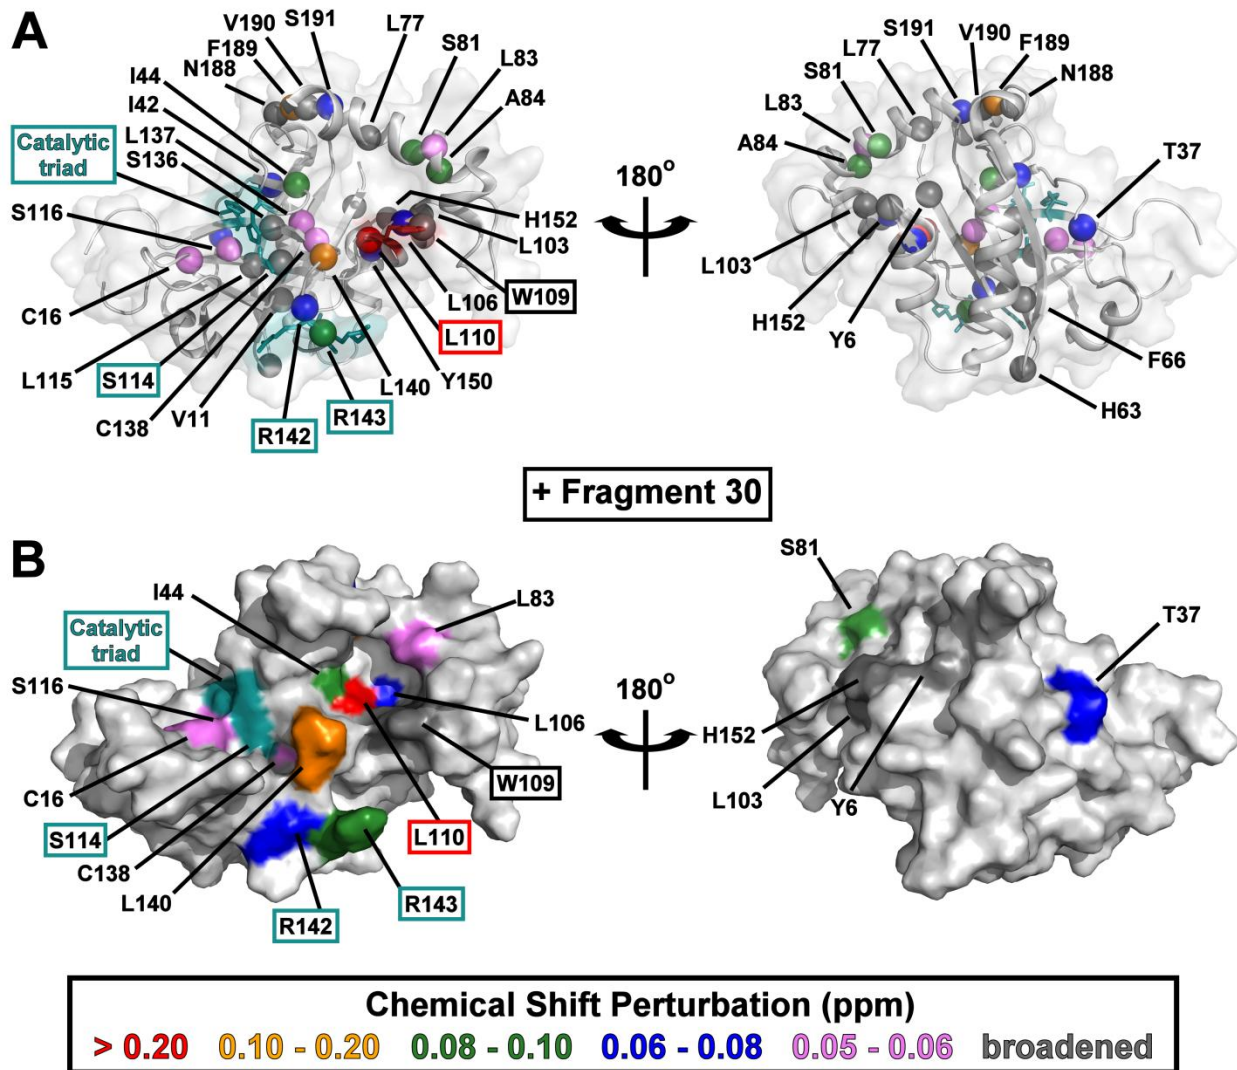

Figure S10:

The structure of monomeric KSHV Pr  $\Delta 196$  (PDB: 3NJQ) with the  $^{15}\text{N}/^1\text{H}$ -HSQC chemical shift perturbations for Fragment **30** indicated by color. Backbone amide resonances which displayed peak broadening upon addition of fragments are indicated in dark gray. Amide backbone nitrogen atoms are shown as colored spheres in (a), while surfaces are displayed in (b). The catalytic triad (His46, Ser114, and His134) and oxyanion hole (Arg142 and Arg143) residues are highlighted in cyan. Left and right structures are rotated  $180^\circ$  about the vertical axis.

Figure S11

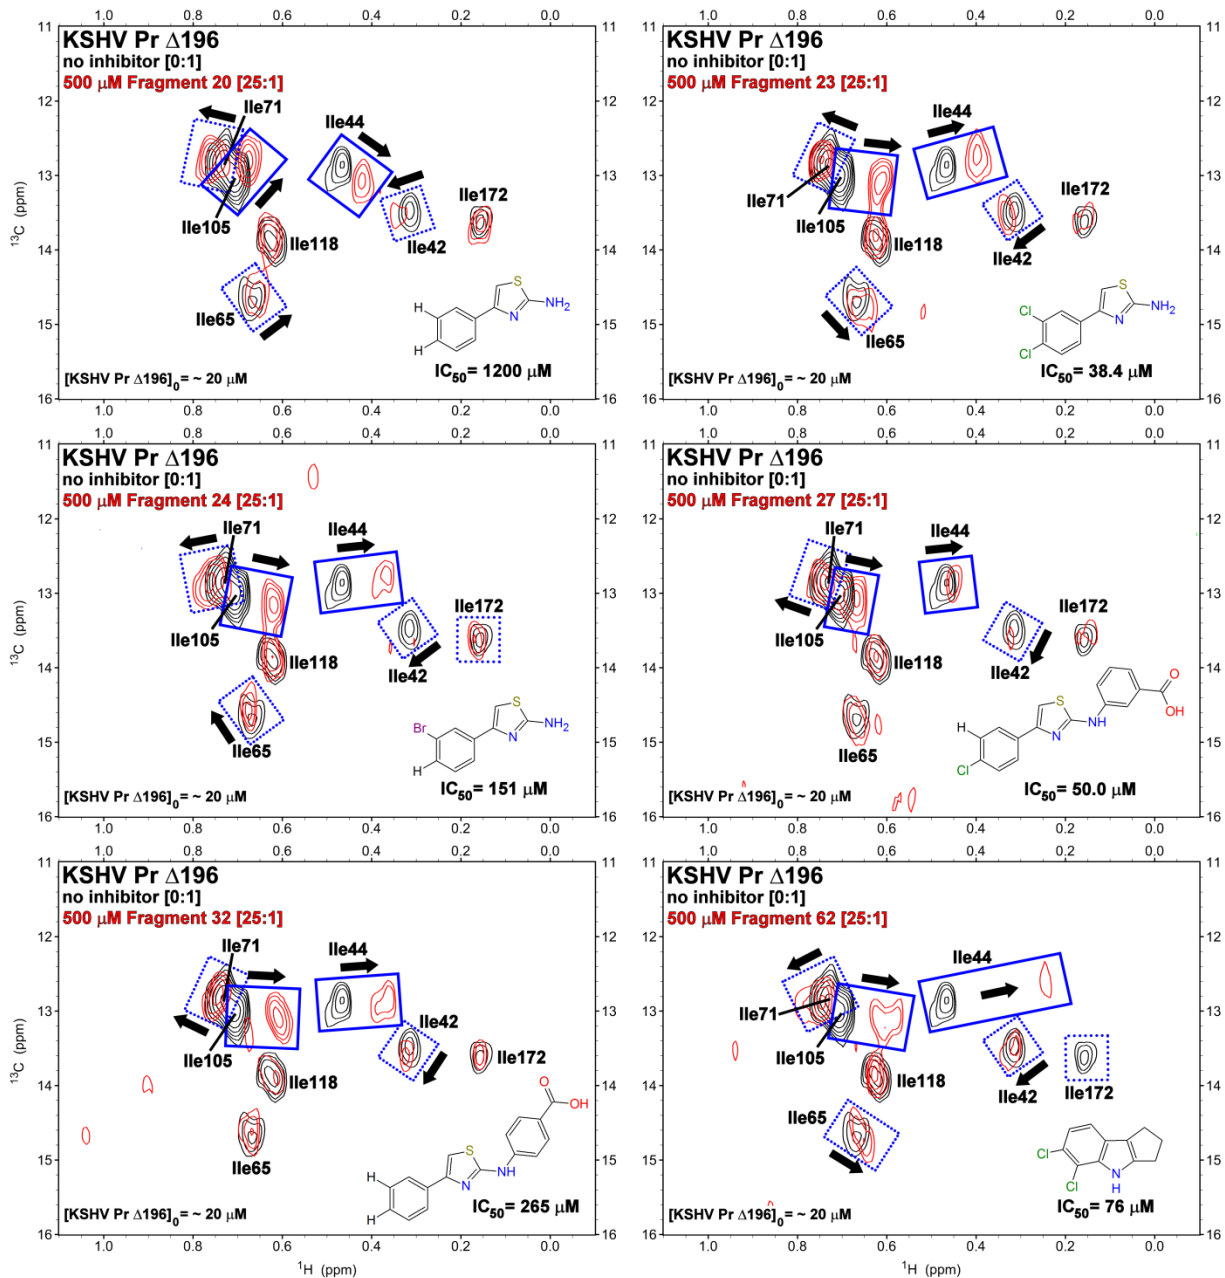

Figure S11:

Overlays of the  $^{13}\text{C}/^1\text{H}$ -HSQC spectra of selectively  $^{13}\text{C}$ -Isoleucine labeled KSHV Pr  $\Delta 196$  in the absence (black) and presence (red) of  $\sim 25\times$  molar excess of selected aminothiazole fragments (Table 2) and Fragment 62 (Table S7). Perturbations of the Ile44 and Ile105 methyl group resonances indicate fragment binding at the dimer interface near the hot spot Trp109.

Figure S12A

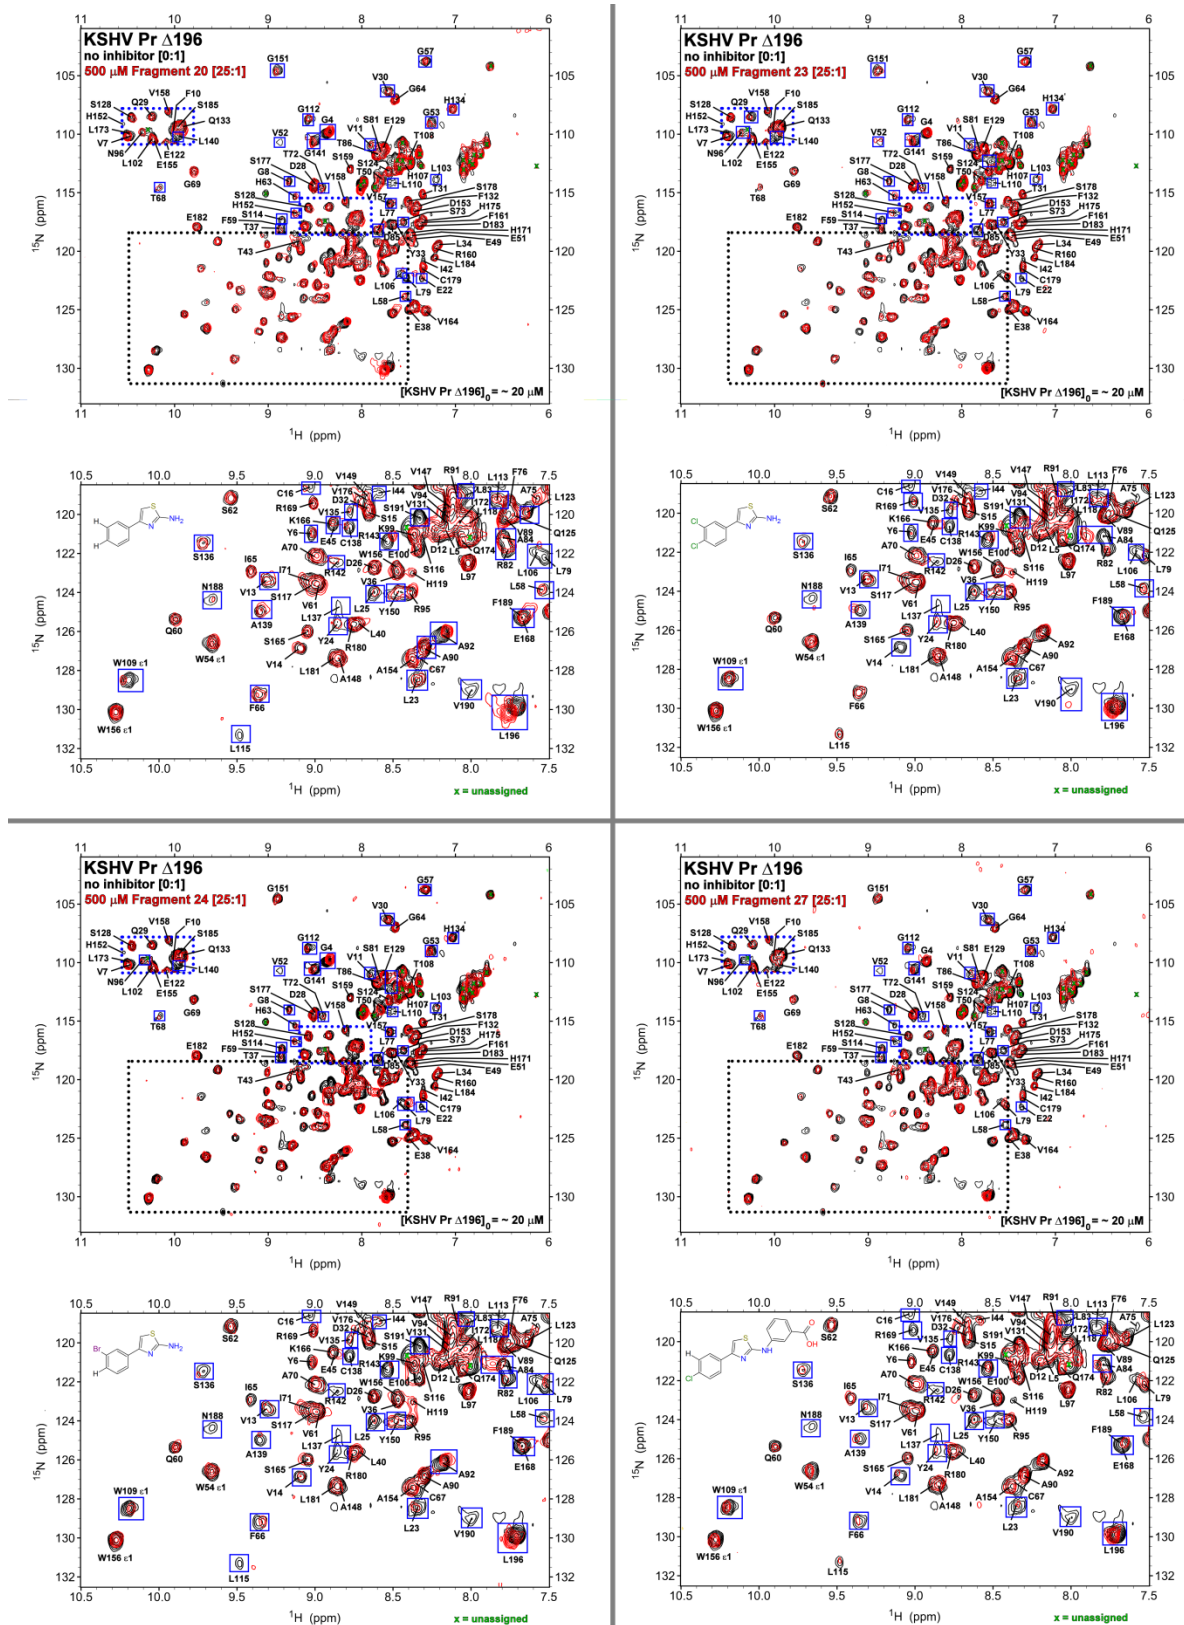

Figure S12B

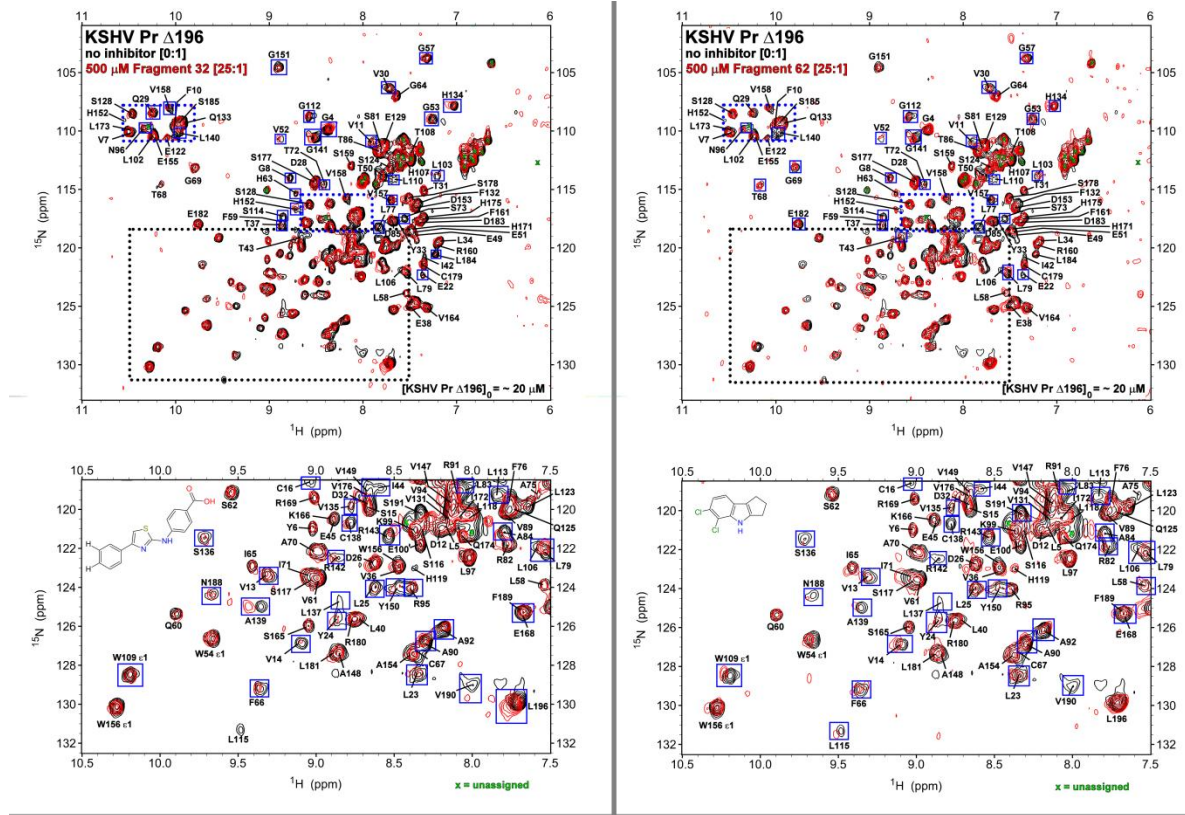

### Figures S12A-S12B:

Overlays of the  $^{15}\text{N}/^1\text{H}$ -HSQC spectra of uniformly  $^{15}\text{N}$ -labeled KSHV Pr  $\Delta 196$  in the absence (black) and presence (red) of  $\sim 25\times$  molar excess of selected aminothiazole fragments (Table 2) and Fragment **62** (Table S7). Top half of each panel: full  $^{15}\text{N}/^1\text{H}$ -HSQC spectra with the crowded middle resonances (blue dotted panel) at the inset. The black dotted regions of the spectra are zoomed in the lower half of each panel.

Figure S13

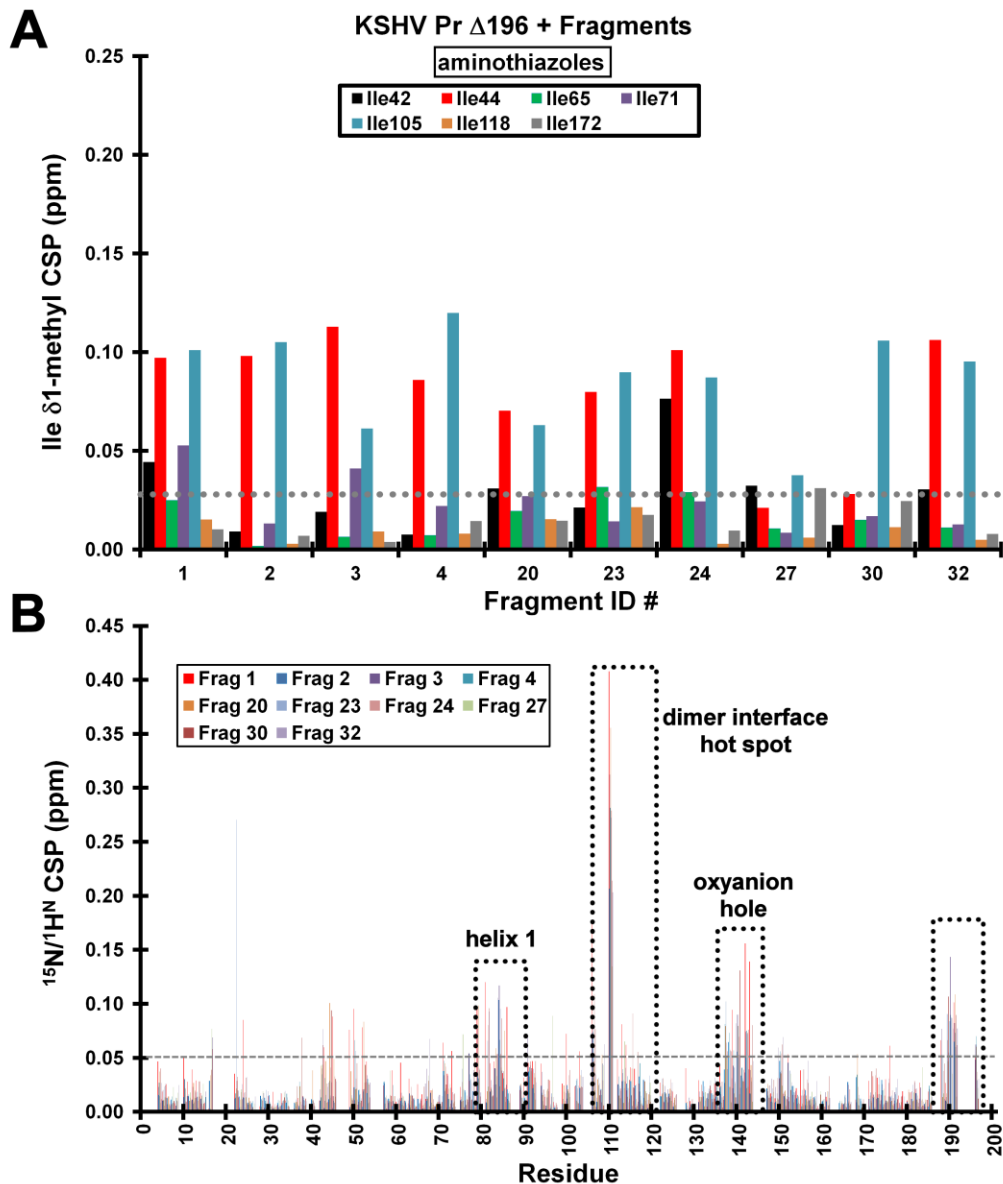**Figure S13:**

(A) Isoleucine  $\delta 1$ -methyl and (B) backbone  $^{15}\text{N}/^1\text{H}^{\text{N}}$  amide CSPs of KSHV Pr  $\Delta 196$  in the presence of 25x molar excess of selected aminothiazole fragments (Table 2). CSPs were calculated from the  $^{13}\text{C}/^1\text{H}$ - and  $^{15}\text{N}/^1\text{H}$ -HSQC spectra appearing in Supporting Figures S9, S11 and S12. The most perturbed backbone amides are highlighted in dotted boxes, and include residues at dimer interface near the hot spot W109, the oxyanion hole, helix 1, and the C-terminus. The largest CSP values for those fragments which demonstrate binding to KSHV Pr are consistently observed for the Leu110 backbone amide, as well as the Ile44 and Ile105  $\delta 1$ -methyl groups. Dotted gray lines represent lower CSP thresholds.
